# Supplementary material
Source: ML conference proceedings conference paper supplement (https://openreview.net/forum?id=wDSx3HGb5S)
Supplement: supplementary_material [file iclr_1923.pdf › iclr_1923.pdf]

# UniMedVL: UNIFYING MEDICAL MULTIMODAL UNDERSTANDING AND GENERATION THROUGH OBSERVATION-KNOWLEDGE-ANALYSIS

Anonymous authors

Paper under double-blind review

## ABSTRACT

Clinical diagnosis demands models that can process multimodal medical inputs (images, patient histories, lab results) and generate diverse outputs including both textual reports and visual content (annotations, segmentation masks, and images). Despite this need, existing medical AI systems disrupt this unified process: medical image understanding models interpret images but cannot generate visual outputs, while medical image generation models synthesize images but cannot provide textual explanations. This leads to gaps in data representation, feature integration, and task-level multimodal capabilities. To this end, we propose a multi-level framework that mirrors clinical diagnosis through the Observation-Knowledge-Analysis (OKA) paradigm. Specifically, at the observation level, we construct **UniMed-5M**, a dataset comprising over 5.6M samples that reformat diverse unimodal data into multimodal pairs for foundational observation. At the knowledge level, we propose **Progressive Curriculum Learning** that systematically introduce medical multimodal knowledge. At the analysis level, we introduce **UniMedVL**, the first medical unified multimodal model for the simultaneous analysis of image understanding and generation tasks within a single architecture. UniMedVL achieves superior performance on five medical image understanding benchmarks, while matching specialized models in generation quality across eight medical imaging modalities. Crucially, our unified architecture enables bidirectional knowledge sharing generation tasks enhance visual understanding features, demonstrating that integrating traditionally separate capabilities within a single medical framework unlocks improvements across diverse clinical scenarios. Code is available at [Link](#).

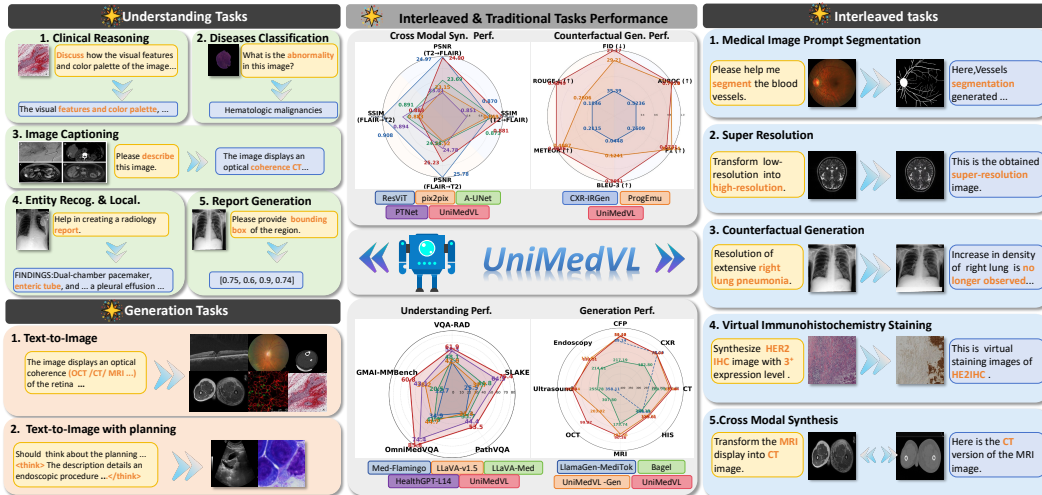

Figure 1: **Overview of UniMedVL unified framework.** Capabilities across medical image understanding and generation tasks and performance comparisons.

# 1 INTRODUCTION

Clinical diagnosis fundamentally follows a structured multi-level reasoning pipeline that is inherently multimodal in both inputs and outputs. Physicians systematically **observe** multimodal raw data (imaging patterns, patient histories, symptom descriptions (Huang et al., 2020)), integrate this with clinical **knowledge** (medical literature, domain expertise, cross-modal associations (Khader et al., 2023)), and **analyse** to produce diverse diagnostic outputs—textual reports explaining findings, visual annotations localizing abnormalities, and comparative imagery for treatment planning (Nguyen et al., 2023; Tanida et al., 2023).

Consider a radiologist examining suspected lung pathology: they process chest X-rays (visual), prior CT scans (cross-modal comparison), and patient history (textual) to generate multiple complementary outputs: detailed reports describing findings, visual annotations highlighting specific regions, and comparative visualizations for surgical planning. This exemplifies how clinical diagnosis requires unified processing of multimodal inputs to generate diverse multimodal outputs, where neither textual reports alone (lacking spatial localization) nor visual annotations alone (lacking reasoning context) suffice. While multimodal fusion has demonstrated substantial improvements in clinical decision-making (Benani et al., 2025; Soenksen et al., 2022), current medical AI remains fragmented, with state-of-the-art models achieving less than 60% accuracy compared to over 90% for human experts on diagnostic challenges (Kaczmarczyk et al., 2024). This fragmentation manifests at three critical levels: (i) **Data**: Medical datasets remain predominantly single-modal despite clear evidence that multimodal integration substantially improves diagnostic accuracy (Warner et al., 2024; Huang et al., 2023). (ii) **Features**: Current approaches lack systematic progressive training strategies that can effectively capture deep cross-modal relationships—most methods simply concatenate features rather than progressively building from basic pattern recognition to sophisticated multimodal reasoning (Haq et al., 2025). (iii) **Tasks**: While general-domain models have made progress in unified architectures, the medical domain still lacks truly unified models. For instance, although HealthGPT demonstrates both understanding and generation capabilities for medical tasks, it requires reloading different model checkpoints to switch between task types—a limitation that prevents seamless multi-task operation in clinical workflows (Lin et al., 2025).

To bridge this gap, we propose a workflow-guided framework that mirrors how physicians actually process medical information through the Observation-Knowledge-Analysis (OKA) paradigm: Observation Level (Data): We construct UniMed-5M, a 5-million sample dataset that, unlike existing single-modal datasets, reformats medical data of various tasks into true multimodal input-output compatible pairs. Knowledge Integration Level (Features): We design Progressive Curriculum Learning that goes beyond naive concatenation. Through three carefully designed stages (alignment for medical data, fusion, and synthesis), our approach materialises models to discover cross-modal patterns better. Analysis Level (Tasks): We introduce UniMedVL, the first unified medical model capable of both understanding and generation within a single architecture at the same time. Our experiments validate two key insights: (1) Medical Representation learning requires framework, allowing the shared representations in medical domains necessitate the OKA framework with sufficient data quality and quantity, for unified medical multimodal learning; (2) Rapid adaptation is achievable, unified model architectures demonstrate the feasibility of quickly adapting to new medical tasks and datasets for scalable multimodal medical AI intelligence. Therefore, our contributions are as follows:

- **Observation (Data-level)**: We construct **UniMed-5M**, a large-scale dataset containing over 5.6M multimodal medical examples that reformat diverse unimodal datasets into uniform multimodal input-output pairs, and serve as the initial building blocks for unifying diverse medical tasks.
- **Knowledge integration (Feature-level)**: We devise **Progressive Curriculum Learning**, a three-stage training paradigm that systematically builds medical multimodal capabilities: foundation training for basic pattern recognition, instruction tuning for cross-modal fusion, and unified multimodal training for advanced synthesis.
- **Analysis (Task-level)**: We introduce **UniMedVL**, a novel unified medical foundation model that provides multimodal capabilities—including understanding multimodal inputs and generating textual reports, image translation, segmentation masks, and synthetic medical images—within a single architecture without needing offline checkpoints once loaded.

## 2 RELATED WORK

### 2.1 MEDICAL MULTIMODAL LARGE LANGUAGE MODELS

Early medical MLLMs took an adapter-style approach, plugging medical vision encoders into general LLMs through lightweight projection or LoRA. [Thawakar et al. \(2024\)](#) aligned MedCLIP with Vicuna via a linear projector in XrayGPT. [Li et al. \(2023\)](#) bootstrapped instruction data from PubMed figures using GPT-4 in LLaVA-Med. These systems proved effective for VQA and reporting but kept fusion shallow and provided no unified route to image synthesis or editing. A second paradigm emphasizes data engineering. [Chen et al. \(2024b\)](#) leveraged GPT-4V to reformat noisy PubMed image-text pairs into the 1.3M-sample PubMedVision corpus in HuatuoGPT-Vision. While this approach mitigates data scarcity and noise, it remains primarily comprehension-oriented; unified, high-fidelity generation is still outside the model proper. [Zhang et al. \(2023a\)](#), which extends beyond radiology to molecules and proteins in a unified seq2seq architecture with BioMedGPT, and [Singhal et al. \(2025\)](#), which reaches expert-level exam performance via chain-of-thought and clinician-aligned instruction with Med-PaLM 2, strengthen biomedical reasoning but do not deliver a unified medical pipeline that natively spans image-level generation and text reasoning. More recently, [Lin et al. \(2025\)](#) emerged with HealthGPT as the first medical MLLM explicitly targeting unified multi-modal input and output. It introduces MOE LoRA to reduce task interference and to cover tasks. However, its unification relies on multiple task-specific models at inference time. As a result, different capabilities are not consolidated into a single, end-to-end model that uniformly expresses all tasks simultaneously.

### 2.2 UNIFIED MULTIMODAL UNDERSTANDING AND GENERATION MODELS

Outside the medical domain, unified multimodal research has developed along several paradigms. Autoregressive models ([Chameleon Team, 2024](#); [Wang et al., 2024](#); [Lu et al., 2022](#); [2024](#)) treat images as discrete tokens within decoder-only Transformers, achieving architectural unity but limiting high-resolution synthesis due to long sequences and discrete reconstruction. Dual-encoder designs ([Wu et al., 2025c](#); [Ma et al., 2025d](#); [Xu et al., 2025](#)) address the granularity conflict between semantic understanding and pixel-level generation through separate visual pathways, improving task-specific performance at increased inference cost. Hybrid objectives combine different generative paradigms: [Zhou et al. \(2024\)](#) jointly optimize text cross-entropy and image diffusion losses in Transfusion, [Xie et al. \(2024\)](#) embed discrete diffusion via Omni-Attention for faster synthesis in SHOW-O, while modular approaches ([Wu et al., 2025e](#); [Deng et al., 2025b](#); [Wu et al., 2024](#)) bridge frozen MLLMs with diffusion models through learnable connectors. These solutions achieve cost-effectiveness but sacrifice end-to-end differentiability. Representation innovations target the semantics-fidelity gap through various strategies: multi-codebook quantization ([Ma et al., 2025c](#)), contrastive-aligned tokenization ([Wu et al., 2025f](#)), unified CLIP semantic spaces ([Chen et al., 2025](#)), and masked autoregressive encoders ([Jiang et al., 2024](#)). Advanced autoregressive methods ([Liao et al., 2025](#); [Zhang et al., 2025](#); [Zhuang et al., 2025](#)) enable high-fidelity interleaved generation through deep fusion, prefilled tokens, and reinforcement learning from human feedback. Despite these advances, balancing semantic understanding with pixel-level reconstruction remains challenging, particularly for fine-grained medical localization and diagnostic-quality image synthesis required in clinical applications.

## 3 METHODOLOGY

Our workflow-guided multi-level framework systematically implements the clinical Observation-Knowledge-Analysis (OKA) paradigm through three corresponding stages: data-level observation for comprehensive multimodal dataset construction, feature-level knowledge integration through principled curriculum learning, and task-level analysis via unified model architecture. Each stage addresses specific computational challenges while maintaining clinical workflow coherence.

### 3.1 OBSERVATION LEVEL: UNIMED-5M DATASET CONSTRUCTION

At the observation level, comprehensive multimodal datasets are constructed to enable systematic processing of diverse medical inputs that mirror clinical practice. The dataset construction follows

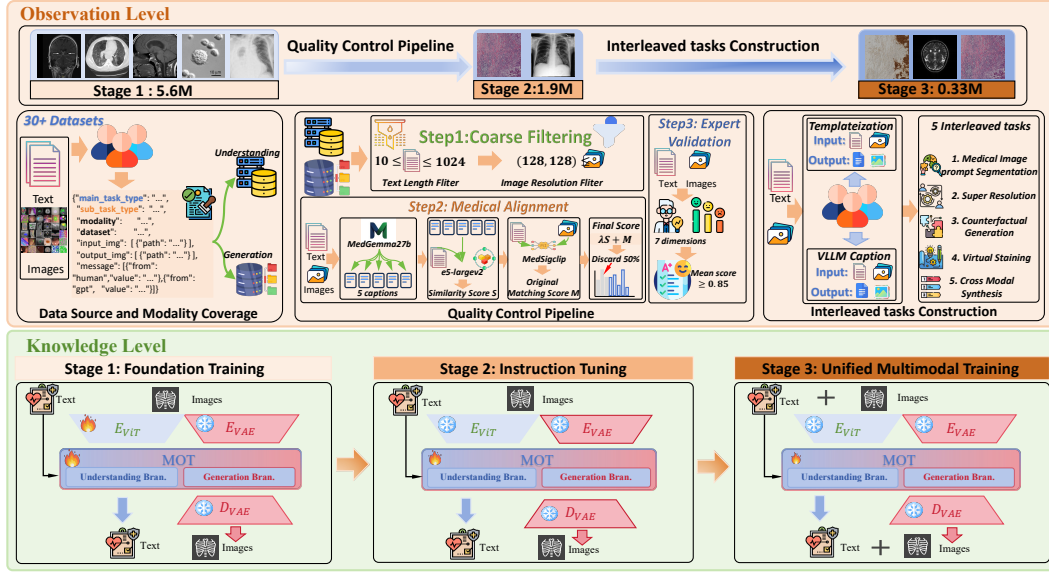

Figure 2: Overview of the proposed **Observation–Knowledge** framework. **Observation**: Covers data sources and modality coverage, quality control pipeline, and interleaved task construction for building training data across different model stages. **Knowledge**: Refers to the progressive curriculum training paradigm, consisting of three stages that gradually equip the model with generalized capabilities on interleaved tasks.

clinical workflow patterns where multiple data modalities are observed and initially processed before knowledge integration. The overall dataset curation pipeline is shown in Fig. 2.

**Data Source and Modality Coverage.** A comprehensive medical dataset comprising 5.6M samples is assembled from diverse public repositories including PMC-OA, Quilt-1M, PubMedVision, GMAI-VL datasets, CheXpertPlus, PMC-VQA, Medical-Diff-VQA, SLAKE, PathVQA, and other specialized medical datasets through systematic data synthesis and augmentation methodologies detailed in Appendix A.2. The collection encompasses nine primary imaging modalities: chest X-rays (CXR), histopathology images (HIS), CT scans, MRI sequences, retinal fundus photography (CFP), optical coherence tomography (OCT), endoscopy, ultrasound, and fluorescence microscopy (FM). The dataset encompasses diverse medical AI task categories spanning understanding, generation, and multimodal input-output capabilities.

**Quality Control Pipeline.** We adopt a three-step pipeline that progressively increases fidelity while controlling cost:

- **Coarse Filtering.** Images are preprocessed through modality-specific normalization and resolution filtering ( $\geq 128 \times 128$  pixels). Text undergoes specialized tokenization that preserves medical terminology, followed by length filtering (16–1024 characters).
- **Medical Alignment.** Because medical captions often emphasize specific pathological findings rather than exhaustive descriptions, we implement a dedicated verification pipeline. MedGemma-27b (Sellergren et al., 2025) generates five diverse captions per image; semantic similarity is computed with E5-large-v2 embeddings (Wang et al., 2022); and medical-specific alignment is assessed using MedSigCLIP (Sellergren et al., 2025). We then compute a combined alignment score  $\text{score}_{\text{final}} = \lambda \cdot \text{similarity}_{\text{E5}} + \text{score}_{\text{MedSigCLIP}}$  with  $\lambda = 0.5$ , retaining the top 50% of pairs as high-quality training data.
- **Expert Validation.** Medical experts draw a 5% stratified subset for comprehensive auditing strictly along the seven dimensions: modality–image match, factual accuracy, information completeness, position/quantity accuracy, professionalism, planning coherence, and clinical reasoning quality. This stage serves as quality assurance rather than additional filtering: on the audited subset, expert ratings across all dimensions are observed to be  $\geq 0.85$  (with high inter-rater agreement), substantiating the dataset’s clinical reliability and mitigating potential LLM hallucinations.



**Interleaved tasks Construction.** This component encompasses five interleaved tasks: medical image prompt segmentation, super-resolution, counterfactual generation, virtual staining, and cross-modal synthesis. We adopt two complementary construction strategies: Templateization and VLLM Caption. In Templateization, inputs and outputs are standardized into structured image-text pairs, where textual prompts explicitly guide the model beyond the provided image and outputs follow a templated format. In contrast, VLLM Captioning emphasizes generating semantically rich textual descriptions that interpret the corresponding images in medical contexts, including symptom analysis and clinical insights.

### 3.2 KNOWLEDGE LEVEL: PROGRESSIVE CURRICULUM LEARNING

At the knowledge integration level, deep cross-modal knowledge fusion is achieved through a principled curriculum learning paradigm that progressively builds from basic medical pattern recognition to sophisticated multimodal reasoning capabilities.

#### Progressive Curriculum Training Paradigm:

- **Stage 1: Foundation Training.** Foundational medical domain awareness is established through unsupervised exposure to comprehensive medical datasets. The foundation training stage prioritizes broad pattern recognition over task-specific performance, enabling robust medical concept acquisition through text-image paired learning and next-token prediction across diverse medical sources. Furthermore, the training emphasizes learning general medical visual-language alignments without task-specific constraints and overly curated datasets.
- **Stage 2: Instruction Tuning.** Medical expertise is systematically developed through fine-tuning on curated high-quality instruction data. The instruction-formatted medical tasks follow the format  $(q, x_v, k) \rightarrow (a_t, a_v)$  where query  $q$ , visual input  $x_v$ , and knowledge context  $k$  generate textual  $a_t$  and visual  $a_v$  responses. We implement differentiated enhancement strategies for distinct task types: For medical understanding tasks such as VQA, we augment standard responses with existing Distilled Chain of Thought (DCOT) data that explicitly articulate the reasoning pathway from visual observation to medical conclusions. For generation tasks, we employ Caption Augmented Generation (CAG) pipeline to enhance caption quality, incorporating structured planning steps that guide the visual synthesis process. The details are provided in Appendix A.5.
- **Stage 3: Unified Multimodal Training.** Multimodal capabilities of generation and understanding are developed through sophisticated tasks requiring integrated visual-textual reasoning. This stage focuses on complex interleaved tasks that combine understanding and generation requirements within unified sequences. The training strategy maintains semantic stability from previous stages while enabling advanced synthesis capabilities through selective parameter optimization, preparing the model for comprehensive clinical analysis workflows.

### 3.3 ANALYSIS LEVEL: UNIMEDVL UNIFIED ARCHITECTURE

At the analysis level, comprehensive multimodal medical outputs are generated through a unified architecture that naturally simulates clinical analytical processes while maintaining cross-modal consistency. The UniMedVL architecture integrates the progressive curriculum learning paradigm into a cohesive system capable of both understanding and generation within a single model.

**Task Organization.** Model training is systematically organised into three primary tasks that reflect fundamental capabilities required for unified medical multimodal systems: (i) Understanding tasks encompassing medical image comprehension, VQA, diagnostic reasoning, image captioning, and clinical report generation; (ii) Generation tasks focusing on text-to-image synthesis with conditional medical image generation and planning-guided approaches; and (iii) Interleaved tasks combining visual-textual inputs and outputs requiring seamless multimodal integration. These interleaved tasks include sophisticated capabilities such as virtual immunohistochemistry staining, cross-modal synthesis (e.g., CT to MRI synthesis), counterfactual generation for treatment planning and development forecasting.

**Model Architecture Overview.** Following Deng et al. (2025a), we adopt a unified architecture with dual visual encoders and mixture-of-transformer-experts (MoT). The understanding-oriented encoder  $E_{VIT}$  extracts semantic tokens  $z_{VIT} = E_{VIT}(x_v)$  for multimodal comprehension tasks, while the

generation-oriented encoder  $E_{VAE}$  produces latent representations  $z_{VAE} = E_{VAE}(x_v)$  for visual synthesis tasks. The MoT module contains specialized transformer experts: an understanding expert processes interleaved sequences of text and ViT tokens  $[x_{text}, z_{ViT}]$  for vision-language understanding, while a generation expert handles sequences containing text and VAE tokens  $[x_{text}, z_{VAE}]$  for image generation. Projection layers  $f_{ViT}$  and  $f_{VAE}$  bridge the visual encoders with the transformer experts, mapping encoded features to the shared hidden dimension. For generation outputs, the decoder  $D_{VAE}$  reconstructs visual content from the latent representations back to pixel space. A generalized causal attention mechanism enables both experts to operate on the same token sequence through shared self-attention operations for different types of tasks, integrating understanding and generation paradigms into a unified framework.

**Training Objectives.** The model is trained with a unified loss function combining understanding task loss and generation task loss. For understanding tasks, we employ next-token prediction:

$$\mathcal{L}_{NTP} = - \sum_{i=1}^n \log p(t_{i+1} | t_{\leq i}, z_{ViT}; \theta), \quad (1)$$

where  $t_i$  denotes the  $i$ -th text token and  $\theta$  represents model parameters. For visual generation, rectified flow matching is applied on VAE latents:

$$\mathcal{L}_{\text{flow}} = \mathbb{E}_{t, \epsilon} [\|v_{\theta}(\tilde{z}_{VAE}, t, c) - v\|^2], \quad (2)$$

where  $v_{\theta}$  is the velocity prediction network,  $\tilde{z}_{VAE}$  represents noisy latents processed by  $D_{VAE}$ ,  $t$  is the time step,  $c$  denotes conditioning, and  $v$  is the target velocity field. The overall training loss is as follows:

$$\mathcal{L} = \mathcal{L}_{NTP}(z_{ViT}) + \alpha \cdot \mathcal{L}_{\text{flow}}(z_{VAE}), \quad (3)$$

where the coefficient  $\alpha$  balances the contribution of generation tasks. We set  $\alpha = 4$  empirically.

## 4 EXPERIMENTS

### 4.1 BENCHMARKS AND BASELINES

**Evaluation Benchmarks.** We evaluate UniMedVL across medical visual understanding and generation benchmarks. For **image understanding tasks**, we employ VQA-RAD (Lau et al., 2018), SLAKE (Liu et al., 2021), PathVQA (He et al., 2020), OmniMedVQA (Hu et al., 2024), and GMAI-MMBench (Ye et al., 2024), which cover diverse medical scenarios. For **image generation tasks**, we split the image-caption pairs in the proposed dataset into 80% for training and 20% for testing. We use the test set to evaluate UniMedVL’s text-to-image generation performance. For **interleaved tasks**, we utilize the BCI dataset (Liu et al., 2022b) for the virtual immunohistochemistry staining task. The IXI dataset (IXI Consortium, 2014) is leveraged to evaluate the super-resolution task, and the BraTS 2023 dataset (Adewole et al., 2023) is used for evaluating the cross-modal synthesis task. We use the ICG-CXR dataset (Ma et al., 2025b) to evaluate the counterfactual generation task.

**Baseline Methods.** These include two categories of methods: **specialized models** and **unified multimodal models**. For specialized models, we include understanding-only models such as Med-Flamingo (Moor et al., 2023), LLaVA-Med (Li et al., 2023), HuatuoGPT-Vision (Chen et al., 2024b), RadFM (Wu et al., 2025a), GMAI-VL (Li et al., 2024), LLaVA-v1.5 (Liu et al., 2024), and InternVL2 (Team, 2024). We also compare with image translation models including CycleGAN (Zhu et al., 2017), pix2pix (Isola et al., 2017), pix2pixHD (Wang et al., 2018), pyramid pix2pix (Liu et al., 2022b), SRCNN (Dong et al., 2015), VDSR (Kim et al., 2016), SwinIR (Liang et al., 2021), Restormer (Zamir et al., 2022), AMIR (Yang et al., 2024), ResViT (Dalmaz et al., 2022), and TransUNet (Chen et al., 2021). Additionally, to determine the model performance of medical imaging generation capability, we finetuned LlamaGen-MedITok (Ma et al., 2025a). For unified multimodal models, we include general frameworks like Janus (Wu et al., 2025d) and Bagel (Deng et al., 2025a), as well as medical unified models such as HealthGPT (Lin et al., 2025).

**Evaluation Metrics.** We employ task-specific metrics aligned with clinical relevance. For **image understanding tasks**, we utilize accuracy as the evaluation metric. For **image generation tasks**, we employ generation FID (gFID) and BioMedCLIP score to evaluate the quality of synthesized images. For **interleaved tasks**, we leverage PSNR and SSIM as evaluation metrics for virtual

Table 1: **Comparison of UniMedVL with other LVLs and unified multi-modal models on medical visual understanding tasks. Bold and underlined text indicate the best performance and second-best performance, respectively.**

| Model                                       | Params     | Medical  | VQA-RAD     | SLAKE       | PathVQA     | OmniMedVQA  | GMAI-MMBench |
|---------------------------------------------|------------|----------|-------------|-------------|-------------|-------------|--------------|
| <b>Understanding Only</b>                   |            |          |             |             |             |             |              |
| LLaVA-v1.5                                  | 7B         | ×        | 42.8        | 37.7        | 31.4        | 44.7        | 38.23        |
| InternVL2                                   | 8B         | ×        | 49.0        | 50.1        | 31.9        | 54.5        | 43.47        |
| Med-Flamingo                                | 8.3B       | ✓        | 43.0        | 25.5        | 31.3        | 34.9        | 12.74        |
| LLaVA-Med                                   | 7B         | ✓        | 48.1        | 44.8        | 35.7        | 41.3        | 20.54        |
| RadFM                                       | 14B        | ✓        | 50.6        | 34.6        | 14.33       | 23.5        | 22.34        |
| HuatuoGPT-Vision-7B                         | 7B         | ✓        | 53.0        | 49.1        | 32.0        | 50.0        | 50.22        |
| GMAI-VL                                     | 7B         | ✓        | <b>66.3</b> | <u>72.9</u> | 39.8        | <b>88.5</b> | <b>61.74</b> |
| <b>Unified Understanding and Generation</b> |            |          |             |             |             |             |              |
| Janus                                       | 1.3B       | ×        | 52.8        | 26.9        | 27.9        | 45.7        | 39.30        |
| Bagel                                       | 7B         | ×        | 60.09       | 58.91       | 39.05       | 71.13       | 48.11        |
| HealthGPT-M3                                | 3.8B       | ✓        | 55.9        | 56.4        | 39.7        | 68.5        | 42.08        |
| HealthGPT-L14                               | 14B        | ✓        | 58.3        | 64.5        | <u>44.4</u> | 74.4        | 43.1         |
| <b>UniMedVL (Ours)</b>                      | <b>14B</b> | <b>✓</b> | <u>61.9</u> | <b>75.4</b> | <b>53.5</b> | <u>85.8</u> | <u>60.75</u> |

Table 2: Performance comparison of our UniMedVL variants and other baseline models on the text-driven image generation task across different modalities. CS denotes BioMedCLIP Score. **Bold and underlined text indicate the best performance and second-best performance, respectively.**

| Method          | CFP          |              | CXR          |              | CT           |              | HIS           |              | MRI          |              | OCT           |              | Ultrasound    |              | Endoscopy     |              | Average       |              |
|-----------------|--------------|--------------|--------------|--------------|--------------|--------------|---------------|--------------|--------------|--------------|---------------|--------------|---------------|--------------|---------------|--------------|---------------|--------------|
|                 | FID↓         | CS↑          | FID↓         | CS↑          | FID↓         | CS↑          | FID↓          | CS↑          | FID↓         | CS↑          | FID↓          | CS↑          | FID↓          | CS↑          | FID↓          | CS↑          | FID↓          | CS↑          |
| LlamaGen-MedTok | 89.14        | -            | <b>68.16</b> | -            | 163.78       | 0.652        | 198.63        | -            | -            | -            | -             | -            | 358.11        | -            | -             | -            | 171.85        | -            |
| Bagel           | 217.19       | 0.650        | 182.80       | 0.662        | 163.78       | 0.652        | 206.18        | 0.643        | 175.74       | 0.639        | 307.80        | 0.719        | 255.78        | 0.672        | 214.61        | 0.668        | 215.49        | 0.660        |
| UniMedVL-Gen    | <u>77.35</u> | <u>0.699</u> | 190.38       | <u>0.672</u> | <u>79.84</u> | <u>0.694</u> | <b>107.20</b> | <u>0.699</u> | <b>82.99</b> | <u>0.699</u> | <u>107.06</u> | <u>0.721</u> | <u>100.44</u> | <u>0.700</u> | <b>121.89</b> | <u>0.704</u> | <u>108.40</u> | <u>0.699</u> |
| UniMedVL        | <b>53.20</b> | <b>0.708</b> | <u>73.04</u> | <b>0.702</b> | <b>73.04</b> | <b>0.696</b> | <u>149.01</u> | <b>0.704</b> | <u>90.36</u> | <b>0.706</b> | <b>99.27</b>  | <b>0.721</b> | <b>95.38</b>  | <b>0.706</b> | <u>133.11</u> | <b>0.707</b> | <b>96.29</b>  | <b>0.706</b> |

immunohistochemistry staining, super-resolution, and cross-modal synthesis tasks. For counterfactual generation, we follow the experimental setup of ProgEmu (Ma et al., 2025b), using gFID, AUC-ROC, and F1 to evaluate the quality of synthesized images, and BLEU-3, METEOR, and ROUGE-L to assess the quality of the explanatory text.

## 4.2 PERFORMANCE OF UNIMEDVL

**Medical Visual Understanding Performance.** We evaluate the understanding capabilities of UniMedVL across diverse medical VQA and image comprehension benchmarks. Table 1 presents comprehensive results comparing our model with existing medical VLLMs and unified multimodal models. Table 1 reveals a critical insight: unified architectures can achieve understanding performance comparable to specialized models without sacrificing generation capabilities. UniMedVL demonstrates this principle by maintaining competitive performance across diverse medical domains while supporting both understanding and generation within a single architecture. The key technical insight emerges from comparing unified models (bottom section) with understanding-only models (top section): HealthGPT requires separate model checkpoints for different tasks, while UniMedVL achieves superior performance (85.8% on OmniMedVQA vs. HealthGPT-L14’s 74.4%) with seamless task switching. This validates our core contribution that progressive curriculum learning enables effective knowledge sharing between understanding and generation pathways in medical contexts.

**Medical Image Generation Performance.** Table 2 provides empirical evidence for cross-modal knowledge transfer in medical generation. A critical insight emerges from comparing UniMedVL-Gen (generation-only training) with UniMedVL: the average gFID improvement demonstrates that understanding tasks contribute semantic constraints to enhance generation quality. Furthermore, UniMedVL achieves BioMedCLIP scores of 0.706 on average across modalities, indicating strong semantic alignment between generated images and clinical text descriptions. This challenges the conventional assumption that joint training compromises individual task performance, instead showing that medical multimodal learning benefits from task synergy when the data bottleneck is relieved.

**Interleaved Multimodal Tasks Performance.** Table 3 demonstrates UniMedVL’s performance on interleaved multimodal tasks. For virtual immunohistochemistry staining (H&E→IHC), UniMedVL achieves 20.27 PSNR, outperforming HealthGPT-M3 by 28%. In MRI super-resolution (4×), our model attains 27.29 PSNR/0.890 SSIM, showing substantial improvement over the unified baseline.

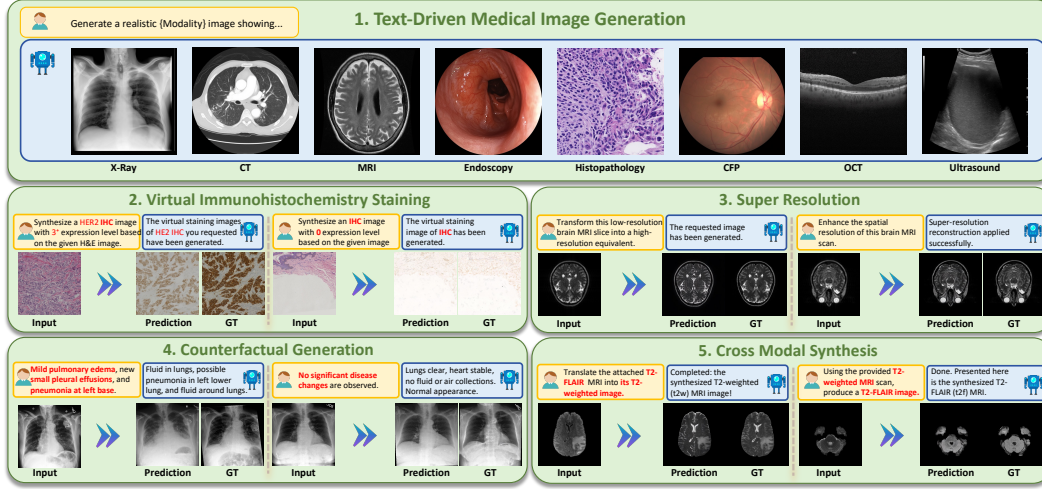

Figure 3: **Comprehensive visualization of UniMedVL's multimodal capabilities.** Demonstration of diverse medical imaging tasks, including text-to-image generation, virtual staining, super resolution, counterfactual generation, and cross-modal synthesis.

For cross-modal synthesis ( $T_2 \leftrightarrow \text{FLAIR}$ ), UniMedVL reaches 25.07 average PSNR, approaching specialized models while maintaining unified capabilities. Figure 3 provides qualitative visualization of these capabilities. The key insight emerges from comparing UniMedVL<sup>†</sup> (mixed data training without progressive stages) with full UniMedVL: consistent improvements across all tasks (e.g., 2.16 PSNR gain in virtual staining) demonstrate that our complete progressive training paradigm effectively learns cross-modal relationships that simple fine-tuning cannot capture.

Table 3: **Performance Comparison on specialised generation tasks.** histological staining transformation (H&E  $\rightarrow$  IHC), MRI super-resolution ( $4\times$ ), and medical image translation ( $T_2 \leftrightarrow \text{FLAIR}$ ). PSNR and SSIM are used in medical image translation. <sup>†</sup> indicates unified fine-tuning variant. **Bold** and underlined text indicate the best performance and second-best performance, respectively.

| H&E→IHC Staining      |                    | MRI Super-Resolution  |                    | Medical Image Translation |                       |                      |                    |
|-----------------------|--------------------|-----------------------|--------------------|---------------------------|-----------------------|----------------------|--------------------|
| Method                | PSNR/SSIM          | Method                | PSNR/SSIM          | Method                    | T <sub>2</sub> →FLAIR | FLAIR→T <sub>2</sub> | Avg                |
| CycleGAN              | 16.20/0.373        | SRCNN                 | 28.81/0.892        | ResViT                    | <b>24.97/0.870</b>    | <b>25.78/0.908</b>   | <b>25.38/0.889</b> |
| Pix2Pix               | 18.65/0.419        | VDSR                  | 30.04/0.914        | pGAN                      | 24.01/0.864           | 25.09/0.894          | 24.55/0.879        |
| Pix2PixHD             | 19.63/0.471        | SwinIR                | 31.55/0.933        | pix2pix                   | 23.15/0.869           | 24.52/0.883          | 23.84/0.876        |
| Pyramid Pix2pix       | <b>21.16/0.477</b> | Restormer             | <u>31.85/0.938</u> | A-UNet                    | 23.69/ <u>0.873</u>   | 24.56/0.891          | 24.13/0.882        |
|                       |                    | AMIR                  | <b>31.99/0.939</b> | SAGAN                     | 24.02/0.860           | 25.10/0.893          | 24.56/0.877        |
| HealthGPT-M3          | 15.81/0.242        | HealthGPT-M3          | 18.37/0.580        | HealthGPT-M3              | 18.88/0.745           | 19.30/0.750          | 19.09/0.748        |
| UniMedVL <sup>†</sup> | 18.11/0.401        | UniMedVL <sup>†</sup> | 19.64/0.602        | UniMedVL <sup>†</sup>     | 23.99/0.711           | 23.49/0.732          | 23.74/0.722        |
| <b>UniMedVL</b>       | <u>20.27/0.456</u> | <b>UniMedVL</b>       | 27.29/0.890        | <b>UniMedVL</b>           | <u>24.90/0.881</u>    | <u>25.23/0.883</u>   | <u>25.07/0.882</u> |

Table 4 evaluates counterfactual generation capabilities with explanatory text. UniMedVL<sup>†</sup> achieves 27.17 gFID and significantly higher text quality metrics (0.2641 BLEU-3, 0.4486 METEOR, 0.4649 ROUGE-L) compared to specialized baselines. The improved counterfactual check rate (0.797 AUROC) demonstrates that our unified training enables generation of clinically plausible scenarios with coherent textual explanations.

Table 4: Comparison of UniMedVL with baseline methods on medical counterfactual generation. **Bold** and underlined text indicate the best performance and second-best performance, respectively.

| Method                      | Counterfactual Image |                  |               | Explanatory Text  |                   |                    |
|-----------------------------|----------------------|------------------|---------------|-------------------|-------------------|--------------------|
|                             | gFID $\downarrow$    | AUROC $\uparrow$ | F1 $\uparrow$ | BLEU-3 $\uparrow$ | METEOR $\uparrow$ | ROUGE-L $\uparrow$ |
| CXR-IRGen                   | 35.39                | 0.5236           | 0.7609        | 0.0448            | 0.2115            | 0.1846             |
| ProgEmu                     | <u>29.21</u>         | <u>0.7921</u>    | <b>0.8914</b> | <u>0.1241</u>     | <u>0.4097</u>     | <u>0.2606</u>      |
| <b>UniMedVL<sup>†</sup></b> | <b>27.17</b>         | <b>0.7970</b>    | <u>0.8731</u> | <b>0.2641</b>     | <b>0.4486</b>     | <b>0.4649</b>      |



Table 5: **Ablation study of the proposed progressive curriculum learning strategy.** UVE refers to the understanding-oriented vision encoder. G and U refer to the generation and understanding subsets of UniMed-5M, respectively. CAG: Caption Augmented Generation, DCOT: Distilled Chain of Thought. **Bold** indicates the best performance and underlined indicates second-best performance.

| Model                                | UVE | $\mathcal{L}_{NTP}$ | $\mathcal{L}_{flow}$ | Data Type         | Understanding |               |               |               | Generation    |               |  |
|--------------------------------------|-----|---------------------|----------------------|-------------------|---------------|---------------|---------------|---------------|---------------|---------------|--|
|                                      |     |                     |                      |                   | GMAI-MMBench  | SLAKE         | PathVQA       | OMVQA         | gFID↓         | BioMedCLIP↑   |  |
| Baseline Comparison                  |     |                     |                      |                   |               |               |               |               |               |               |  |
| One-Stage-Joint-Base                 | ×   | ✓                   | ✓                    | U+G               | 0.5354        | 0.6560        | 0.4946        | 0.7784        | 123.48        | 0.6945        |  |
| Stage 1: Foundation Training         |     |                     |                      |                   |               |               |               |               |               |               |  |
| F-Baseline                           | ×   | ×                   | ×                    | -                 | 0.481         | 0.589         | 0.390         | 0.7113        | 212.73        | 0.662         |  |
| C-G-only                             | ×   | ×                   | ✓                    | G                 | -             | -             | -             | -             | 118.5991      | <u>0.6994</u> |  |
| B-U-only                             | ✓   | ✓                   | ×                    | U                 | 0.505         | 0.5476        | 0.3673        | 0.7723        | -             | -             |  |
| H-Joint-Base                         | ✓   | ✓                   | ✓                    | U+G               | 0.593         | 0.6843        | 0.3649        | 0.8562        | 121.02        | 0.683         |  |
| Stage 2: Instruction Tuning          |     |                     |                      |                   |               |               |               |               |               |               |  |
| C-G-only                             | ×   | ×                   | ✓                    | CAG               | -             | -             | -             | -             | <u>108.40</u> | 0.698         |  |
| B-U-only                             | ✓   | ✓                   | ×                    | DCOT              | 0.5432        | 0.6032        | 0.4526        | 0.8167        | -             | -             |  |
| H-Joint-Base                         | ✓   | ✓                   | ✓                    | High-quality U+G  | <u>0.6004</u> | <u>0.7418</u> | <u>0.5130</u> | <b>0.8626</b> | 120.036       | 0.6989        |  |
| Stage 3: Unified Multimodal Training |     |                     |                      |                   |               |               |               |               |               |               |  |
| H-Joint-Base                         | ✓   | ✓                   | ✓                    | Interleaved tasks | <b>0.6075</b> | <b>0.7540</b> | <b>0.5346</b> | <u>0.8584</u> | <b>96.287</b> | <b>0.7058</b> |  |

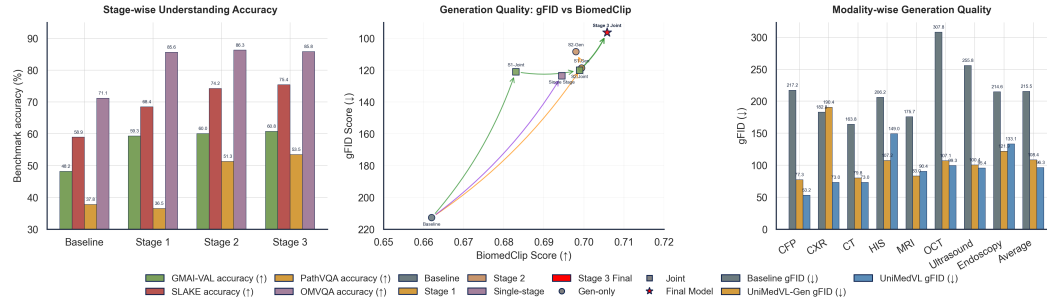

Figure 4: **Visual Comparison of Performance across different training stages and modalities.** (Left:) Stage-wise understanding accuracy performance. (Center:) Generation quality evolution with gFID reduction and BioMedCLIP score enhancement through different training stages. (Right:) Modality-specific generation performance comparison across UniMedVL variants.

### 4.3 ABLATION STUDY

Table 5 and Figure 4 validate how our Knowledge level and Analysis level synergistically improve model capabilities. The critical finding is that joint training (H-Joint-Base) consistently outperforms single-task variants during the stage 1, indicating that UniMedVL learns fundamental unified multimodal representations to effectively perform both understanding and generation tasks. The stage 2 further improves the performance on both understanding and generation tasks. The understanding and generation capabilities are enhanced by the instructions with a reasoning process and high-quality image captions, respectively. The stage 3 brings significant improvement, demonstrating that the unified multimodal representations are further improved at this stage and support both understanding and generation tasks.

## 5 CONCLUSION

We presented UniMedVL, a unified framework that simultaneously performs medical image understanding and generation within a single model, validated through extensive experiments on over 5 million medical samples demonstrating both state-of-the-art comprehension (75.40% SLAKE) and competitive generation quality (95.80 gFID). While our current work focuses on 2D medical imaging, the proposed OKA paradigm establishes foundations for exploring diverse medical AI tasks beyond those demonstrated, including 3D volumetric analysis, temporal reasoning, and multimodal clinical decision support. This work represents a critical step toward truly integrated medical AI systems where understanding and generation capabilities synergistically enhance clinical workflows.

## REFERENCES

- Maruf Adewole, Jeffrey D Rudie, Anu Gbdamosi, Oluyemisi Toyobo, Confidence Raymond, Dong Zhang, Olubukola Omidiji, Rachel Akinola, Mohammad Abba Suwaid, Adaobi Emegoakor, et al. The brain tumor segmentation (brats) challenge 2023: Glioma segmentation in sub-saharan africa patient population (brats-africa). *ArXiv*, pp. arXiv–2305, 2023.
- Ivo M Baltruschat, Parvaneh Janbakhshi, and Matthias Lenga. Brasyn 2023 challenge: Missing mri synthesis and the effect of different learning objectives. In *International Challenge on Cross-Modality Domain Adaptation for Medical Image Segmentation*, pp. 58–68. Springer, 2023.
- Alaeddine Benani, Stéphane Ohayon, Fewa Laleye, Pierre Bauvin, Emmanuel Messas, Sylvain Bodard, and Xavier Tannier. Is multimodal better? a systematic review of multimodal versus unimodal machine learning in clinical decision-making. *medRxiv*, pp. 2025–03, 2025.
- Black Forest Labs. Flux, 2024. URL <https://github.com/black-forest-labs/flux>. GitHub repository.
- Pierre Chambon, Jean-Benoît Delbrouck, Thomas Sounack, Shih-Cheng Huang, Zhihong Chen, Maya Varma, Steven QH Truong, Chu The Chuong, and Curtis P Langlotz. Chexpert plus: Augmenting a large chest x-ray dataset with text radiology reports, patient demographics and additional image formats. *arXiv preprint arXiv:2405.19538*, 2024.
- Chameleon Team. Chameleon: Mixed-modal early-fusion foundation models. *arXiv preprint arXiv:2405.09818*, 2024. doi: 10.48550/arXiv.2405.09818. URL <https://arxiv.org/abs/2405.09818>.
- Jieneng Chen, Yongyi Lu, Qihang Yu, Xiangde Luo, Ehsan Adeli, Yan Wang, Le Lu, Alan L Yuille, and Yuyin Zhou. Transunet: Transformers make strong encoders for medical image segmentation. *arXiv preprint arXiv:2102.04306*, 2021.
- Jiuhai Chen, Zhiyang Xu, Xichen Pan, Yushi Hu, Can Qin, Tom Goldstein, Lifu Huang, Tianyi Zhou, Saining Xie, Silvio Savarese, Le Xue, Caiming Xiong, and Ran Xu. Blip3-o: A family of fully open unified multimodal models – architecture, training and dataset. *arXiv preprint arXiv:2505.09568*, 2025. doi: 10.48550/arXiv.2505.09568. URL <https://arxiv.org/abs/2505.09568>.
- Junying Chen, Chi Gui, Ruyi Ouyang, Anningzhe Gao, Shunian Chen, Guiming Chen, Xidong Wang, Zhenyang Cai, Ke Ji, Xiang Wan, et al. Towards injecting medical visual knowledge into multimodal llms at scale. In *Proceedings of the 2024 Conference on Empirical Methods in Natural Language Processing*, pp. 7346–7370, 2024a.
- Junying Chen, Chi Gui, Ruyi Ouyang, Anningzhe Gao, Shunian Chen, Guiming Hardy Chen, Xidong Wang, Ruifei Zhang, Zhenyang Cai, Ke Ji, et al. Huatuogpt-vision, towards injecting medical visual knowledge into multimodal llms at scale. *arXiv preprint arXiv:2406.19280*, 2024b.
- Zhe Chen, Jiannan Wu, Wenhai Wang, Weijie Su, Guo Chen, Sen Xing, Muyan Zhong, Qinglong Zhang, Xizhou Zhu, Lewei Lu, et al. Internvl: Scaling up vision foundation models and aligning for generic visual-linguistic tasks. In *Proceedings of the IEEE/CVF conference on computer vision and pattern recognition*, pp. 24185–24198, 2024c.
- Onat Dalmaz, Mahmut Yurt, and Tolga Çukur. Resvit: Residual vision transformers for multimodal medical image synthesis. *IEEE Transactions on Medical Imaging*, 41(10):2598–2614, 2022.
- Chaorui Deng, Deyao Zhu, Kunchang Li, Chenhui Gou, Feng Li, Zeyu Wang, Shu Zhong, Weihao Yu, Xiaonan Nie, Ziang Song, et al. Emerging properties in unified multimodal pretraining. *arXiv preprint arXiv:2505.14683*, 2025a.
- Chunyu Deng et al. Emerging properties in unified multimodal pretraining. *arXiv preprint arXiv:2505.14683*, 2025b. doi: 10.48550/arXiv.2505.14683. URL <https://arxiv.org/abs/2505.14683>. Introduces the open-source unified multimodal model BAGEL.
- Chao Dong, Chen Change Loy, Kaiming He, and Xiaoou Tang. Image super-resolution using deep convolutional networks. *IEEE transactions on pattern analysis and machine intelligence*, 38(2): 295–307, 2015.

- Jason Fries, Leon Weber, Natasha Seelam, Gabriel Altay, Debajyoti Datta, Samuele Garda, Sunny Kang, Rosaline Su, Wojciech Kusa, Samuel Cahyawijaya, et al. Bigbio: A framework for data-centric biomedical natural language processing. *Advances in Neural Information Processing Systems*, 35:25792–25806, 2022.
- Imran Ul Haq, Mustafa Mhamed, Mohammed Al-Harbi, Hamid Osman, Zuhail Y Hamd, and Zhe Liu. Advancements in medical radiology through multimodal machine learning: A comprehensive overview. *Bioengineering*, 12(5):477, 2025.
- Xuehai He, Yichen Zhang, Luntian Mou, Eric Xing, and Pengtao Xie. Pathvqa: 30000+ questions for medical visual question answering. *arXiv preprint arXiv:2003.10286*, 2020.
- Xinyue Hu, L Gu, Q An, M Zhang, L Liu, K Kobayashi, T Harada, R Summers, and Y Zhu. Medical-diff-vqa: a large-scale medical dataset for difference visual question answering on chest x-ray images. *PhysioNet*, 12:13, 2023.
- Yutao Hu, Tianbin Li, Quanfeng Lu, Wenqi Shao, Junjun He, Yu Qiao, and Ping Luo. Omnimedvqa: A new large-scale comprehensive evaluation benchmark for medical lvlm. In *Proceedings of the IEEE/CVF Conference on Computer Vision and Pattern Recognition*, pp. 22170–22183, 2024.
- S. C. Huang, A. Pareek, R. Zamanian, C. Banerjee, J. L. Lungren, and M. P. Langlotz. Fusion of medical imaging and electronic health records. *NPJ Digital Medicine*, 3:1–9, 2020. doi: 10.1038/s41746-020-00341-z.
- Shih-Cheng Huang, Zepeng Huo, Ethan Steinberg, Chia-Chun Chiang, Curtis Langlotz, Matthew Lungren, Serena Yeung, Nigam Shah, and Jason Fries. Inspect: a multimodal dataset for patient outcome prediction of pulmonary embolisms. *Advances in Neural Information Processing Systems*, 36:17742–17772, 2023.
- Wisdom Ikezogwo, Saygin Seyfioglu, Fatemeh Ghezloo, Dylan Geva, Fatwir Sheikh Mohammed, Pavan Kumar Anand, Ranjay Krishna, and Linda Shapiro. Quilt-1m: One million image-text pairs for histopathology. *Advances in neural information processing systems*, 36:37995–38017, 2023.
- Information eXtraction from Images (IXI) Project. Ixi dataset, 2024. URL <https://brain-development.org/ixi-dataset/>. Nearly 600 subjects with T1/T2/PD/MRA/DTI MRI acquired at three London hospitals.
- Phillip Isola, Jun-Yan Zhu, Tinghui Zhou, and Alexei A Efros. Image-to-image translation with conditional adversarial networks. In *Proceedings of the IEEE conference on computer vision and pattern recognition*, pp. 1125–1134, 2017.
- IXI Consortium. Ixi dataset. <https://brain-development.org/ixi-dataset/>, 2014. Information eXtraction from Images (EPSRC GR/S21533/02), nearly 600 MRI scans from healthy subjects.
- Zihang Jiang, Yifan Zhou, Zhenyu Jiang, Xiulong Liu, Guanya Shi, Peter Stone, and Yuke Zhu. Whole-body motion generation of humanoid robots from language. *arXiv preprint arXiv:2410.12773*, 2024. doi: 10.48550/arXiv.2410.12773. URL <https://arxiv.org/abs/2410.12773>. Project: Harmon.
- Robert Kaczmarczyk, Theresa Isabelle Wilhelm, Ron Martin, and Jonas Roos. Evaluating multimodal ai in medical diagnostics. *npj Digital Medicine*, 7(1):205, 2024.
- Firas Khader, Gustav Müller-Franzes, Tianci Wang, Tianyu Han, Soroosh Tayebi Arasteh, Christoph Haarbuerger, Johannes Stegmaier, Keno Bresslem, Christiane Kuhl, Sven Nebelung, Jakob Nikolas Kather, and Daniel Truhn. Multimodal deep learning for integrating chest radiographs and clinical parameters: A case for transformers. *Radiology*, 309(1):e230806, 2023. doi: 10.1148/radiol.230806.
- Jiwon Kim, Jung Kwon Lee, and Kyoung Mu Lee. Accurate image super-resolution using very deep convolutional networks. In *Proceedings of the IEEE conference on computer vision and pattern recognition*, pp. 1646–1654, 2016.

- Jason J Lau, Soumya Gayen, Asma Ben Abacha, and Dina Demner-Fushman. A dataset of clinically generated visual questions and answers about radiology images. *Scientific data*, 5(1):1–10, 2018.
- Chunyu Li, Cliff Wong, Sheng Zhang, Naoto Usuyama, Haotian Liu, Jianwei Yang, Tristan Naumann, Hoifung Poon, and Jianfeng Gao. Llava-med: Training a large language-and-vision assistant for biomedicine in one day. *Advances in Neural Information Processing Systems*, 36: 28541–28564, 2023.
- Tianbin Li, Yanzhou Su, Wei Li, Bin Fu, Zhe Chen, Ziyang Huang, Guoan Wang, Chenglong Ma, Ying Chen, Ming Hu, Yanjun Li, Pengcheng Chen, Xiaowei Hu, Zhongying Deng, Yuanfeng Ji, Jin Ye, Yu Qiao, and Junjun He. Gmai-vl & gmai-vl-5.5m: A large vision-language model and a comprehensive multimodal dataset towards general medical ai, 2024.
- Jingyun Liang, Jiezhong Cao, Guolei Sun, Kai Zhang, Luc Van Gool, and Radu Timofte. Swinir: Image restoration using swin transformer. In *Proceedings of the IEEE/CVF international conference on computer vision*, pp. 1833–1844, 2021.
- Chao Liao, Liyang Liu, Xun Wang, Zhengxiong Luo, Xinyu Zhang, Wenliang Zhao, Jie Wu, Liang Li, Zhi Tian, and Weilin Huang. Mogao: An omni foundation model for interleaved multi-modal generation. *arXiv preprint arXiv:2505.05472*, 2025. doi: 10.48550/arXiv.2505.05472. URL <https://arxiv.org/abs/2505.05472>.
- Tianwei Lin, Wenqiao Zhang, Sijing Li, Yuqian Yuan, Binhe Yu, Haoyuan Li, Wanggui He, Hao Jiang, Mengze Li, Xiaohui Song, et al. Healthgpt: A medical large vision-language model for unifying comprehension and generation via heterogeneous knowledge adaptation. *arXiv preprint arXiv:2502.09838*, 2025.
- Weixiong Lin, Ziheng Zhao, Xiaoman Zhang, Chaoyi Wu, Ya Zhang, Yanfeng Wang, and Weidi Xie. Pmc-clip: Contrastive language-image pre-training using biomedical documents. In *International Conference on Medical Image Computing and Computer-Assisted Intervention*, pp. 525–536, 2023.
- Bo Liu, Li-Ming Zhan, Li Xu, Lin Ma, Yan Yang, and Xiao-Ming Wu. Slake: A semantically-labeled knowledge-enhanced dataset for medical visual question answering. In *2021 IEEE 18th international symposium on biomedical imaging (ISBI)*, pp. 1650–1654. IEEE, 2021.
- Haotian Liu, Chunyu Li, Yuheng Li, and Yong Jae Lee. Improved baselines with visual instruction tuning. In *Proceedings of the IEEE/CVF conference on computer vision and pattern recognition*, pp. 26296–26306, 2024.
- Shengjie Liu, Chuang Zhu, Feng Xu, Xinyu Jia, Zhongyue Shi, and Mulan Jin. Bci: Breast cancer immunohistochemical image generation through pyramid pix2pix. In *Proceedings of the IEEE/CVF Conference on Computer Vision and Pattern Recognition Workshops (CVPRW)*, pp. 1815–1824, June 2022a.
- Shengjie Liu, Chuang Zhu, Feng Xu, Xinyu Jia, Zhongyue Shi, and Mulan Jin. Bci: Breast cancer immunohistochemical image generation through pyramid pix2pix. In *Proceedings of the IEEE/CVF conference on computer vision and pattern recognition*, pp. 1815–1824, 2022b.
- Jiasen Lu, Christopher Clark, Rowan Zellers, Roozbeh Mottaghi, and Aniruddha Kembhavi. Unified-io: A unified model for vision, language, and multi-modal tasks. *arXiv preprint arXiv:2206.08916*, 2022. doi: 10.48550/arXiv.2206.08916. URL <https://arxiv.org/abs/2206.08916>.
- Jiasen Lu, Christopher Clark, Sangho Lee, Zichen Zhang, Savya Khosla, Ryan Marten, Derek Hoiem, and Aniruddha Kembhavi. Unified-io 2: Scaling autoregressive multi-modal models with vision, language, audio, and action. In *CVPR*, pp. 26439–26455, 2024. URL [https://openaccess.thecvf.com/content/CVPR2024/papers/Lu\\_Unified-IO\\_2\\_Scaling\\_Autoregressive\\_Multimodal\\_Models\\_with\\_Vision\\_Language\\_Audio\\_CVPR\\_2024\\_paper.pdf](https://openaccess.thecvf.com/content/CVPR2024/papers/Lu_Unified-IO_2_Scaling_Autoregressive_Multimodal_Models_with_Vision_Language_Audio_CVPR_2024_paper.pdf).
- Chenglong Ma, Yuanfeng Ji, Jin Ye, Zilong Li, Chenhui Wang, Junzhi Ning, Wei Li, Lihao Liu, Qiushan Guo, Tianbin Li, et al. Meditok: A unified tokenizer for medical image synthesis and interpretation. *arXiv preprint arXiv:2505.19225*, 2025a.



- Chenglong Ma, Yuanfeng Ji, Jin Ye, Lu Zhang, Ying Chen, Tianbin Li, Mingjie Li, Junjun He, and Hongming Shan. Towards interpretable counterfactual generation via multimodal autoregression. In *International Conference on Medical Image Computing and Computer-Assisted Intervention*, pp. 611–620. Springer, 2025b.
- Chuofan Ma, Yi Jiang, Junfeng Wu, Jihan Yang, Xin Yu, Zehuan Yuan, Bingyue Peng, and Xiaojuan Qi. Unitok: A unified tokenizer for visual generation and understanding. *arXiv preprint arXiv:2502.20321*, 2025c. doi: 10.48550/arXiv.2502.20321. URL <https://arxiv.org/abs/2502.20321>.
- Yiyang Ma, Xingchao Liu, Xiaokang Chen, Wen Liu, Chengyue Wu, Zhiyu Wu, Zizheng Pan, Zhenda Xie, Haowei Zhang, Xingkai Yu, et al. Janusflow: Harmonizing autoregression and rectified flow for unified multimodal understanding and generation. In *Proceedings of the Computer Vision and Pattern Recognition Conference*, pp. 7739–7751, 2025d.
- Michael Moor, Qian Huang, Shirley Wu, Michihiro Yasunaga, Yash Dalmia, Jure Leskovec, Cyril Zakka, Eduardo Pontes Reis, and Pranav Rajpurkar. Med-flamingo: a multimodal medical few-shot learner. In *Machine Learning for Health (ML4H)*, pp. 353–367. PMLR, 2023.
- D. Nguyen, C. Chen, H. He, and C. Tan. Pragmatic radiology report generation. In *Proceedings of Machine Learning for Health (ML4H)*, PMLR, 2023. doi: 10.48550/arXiv.2303.08715.
- Andrew Sellergren, Sahar Kazemzadeh, Tiam Jaroensri, Atilla Kiraly, Madeleine Traverse, Timo Kohlberger, Shawn Xu, Fayaz Jamil, Cían Hughes, Charles Lau, et al. Medgemma technical report. *arXiv preprint arXiv:2507.05201*, 2025.
- Karan Singhal, Tao Tu, Juraj Gottweis, Rory Sayres, Ellery Wulczyn, Mohamed Amin, Le Hou, Kevin Clark, Stephen R Pfohl, Heather Cole-Lewis, et al. Toward expert-level medical question answering with large language models. *Nature Medicine*, 31(3):943–950, 2025.
- Luis R Soenksen, Yu Ma, Cynthia Zeng, Leonard Boussieux, Kimberly Villalobos Carballo, Liangyuan Na, Holly M Wiberg, Michael L Li, Ignacio Fuentes, and Dimitris Bertsimas. Integrated multimodal artificial intelligence framework for healthcare applications. *NPJ digital medicine*, 5(1):149, 2022.
- Sanjay Subramanian, Lucy Lu Wang, Sachin Mehta, Ben Bogin, Madeleine Van Zuylen, Sravanthi Parasa, Sameer Singh, Matt Gardner, and Hannaneh Hajishirzi. Medcat: A dataset of medical images, captions, and textual references. *arXiv preprint arXiv:2010.06000*, 2020.
- Tim Tanida, Philip Müller, Georgios Kaissis, and Daniel Rueckert. Interactive and explainable region-guided radiology report generation. In *Proceedings of the IEEE/CVF Conference on Computer Vision and Pattern Recognition (CVPR)*, pp. 24101–24111, 2023. doi: 10.1109/CVPR52688.2023.02357.
- OpenGVLab Team. Internvl2: Better than the best—expanding performance boundaries of open-source multimodal models with the progressive scaling strategy, 2024.
- Omkar Chakradhar Thawakar, Abdelrahman M Shaker, Sahal Shaji Mullappilly, Hisham Cholakkal, Rao Muhammad Anwer, Salman Khan, Jorma Laaksonen, and Fahad Khan. Xraygpt: Chest radiographs summarization using large medical vision-language models. In *Proceedings of the 23rd workshop on biomedical natural language processing*, pp. 440–448, 2024.
- Adrian Thummerer, Erik van der Bijl, Arthur Jr Galapon, Florian Kamp, Mark Savenije, Christina Muijs, Shafak Aluwini, Roel JHM Steenbakkens, Stephanie Beuel, Martijn PW Intven, et al. Synthrad2025 grand challenge dataset: Generating synthetic cts for radiotherapy from head to abdomen. *Medical physics*, 52(7):e17981, 2025.
- Liang Wang, Nan Yang, Xiaolong Huang, Binxing Jiao, Linjun Yang, Daxin Jiang, Rangan Majumder, and Furu Wei. Text embeddings by weakly-supervised contrastive pre-training. *arXiv preprint arXiv:2212.03533*, 2022.
- Ting-Chun Wang, Ming-Yu Liu, Jun-Yan Zhu, Andrew Tao, Jan Kautz, and Bryan Catanzaro. High-resolution image synthesis and semantic manipulation with conditional gans. In *Proceedings of the IEEE conference on computer vision and pattern recognition*, pp. 8798–8807, 2018.

- Xinlong Wang, Xiaosong Zhang, Zhengxiong Luo, Quan Sun, Yufeng Cui, Jinsheng Wang, Fan Zhang, Yueze Wang, Zhen Li, Qiyang Yu, Yingli Zhao, Yulong Ao, Xuebin Min, Tao Li, Boya Wu, Bo Zhao, Bowen Zhang, Liangdong Wang, Guang Liu, Zheqi He, Xi Yang, Jingjing Liu, Yonghua Lin, Tiejun Huang, and Zhongyuan Wang. Emu3: Next-token prediction is all you need. *arXiv preprint arXiv:2409.18869*, 2024. doi: 10.48550/arXiv.2409.18869. URL <https://arxiv.org/abs/2409.18869>.
- Elisa Warner, Joonsang Lee, William Hsu, Tanveer Syeda-Mahmood, Charles E Kahn Jr, Olivier Gevaert, and Arvind Rao. Multimodal machine learning in image-based and clinical biomedicine: Survey and prospects. *International journal of computer vision*, 132(9):3753–3769, 2024.
- Chaoyi Wu, Xiaoman Zhang, Ya Zhang, Hui Hui, Yanfeng Wang, and Weidi Xie. Towards generalist foundation model for radiology by leveraging web-scale 2d&3d medical data. *Nature Communications*, 16(1):7866, 2025a.
- Chaoyi Wu, Xiaoman Zhang, Ya Zhang, Hui Hui, Yanfeng Wang, Weidi Xie, et al. Towards generalist foundation model for radiology by leveraging web-scale 2d&3d medical data. *Nature Communications*, 16:7866, 2025b. doi: 10.1038/s41467-025-62385-7. URL <https://www.nature.com/articles/s41467-025-62385-7>. Article number.
- Chengyue Wu, Xiaokang Chen, Zhiyu Wu, Yiyang Ma, Xingchao Liu, Zizheng Pan, Wen Liu, Zhenda Xie, Xingkai Yu, Chong Ruan, et al. Janus: Decoupling visual encoding for unified multimodal understanding and generation. In *Proceedings of the Computer Vision and Pattern Recognition Conference*, pp. 12966–12977, 2025c.
- Chengyue Wu, Xiaokang Chen, Zhiyu Wu, Yiyang Ma, Xingchao Liu, Zizheng Pan, Wen Liu, Zhenda Xie, Xingkai Yu, Chong Ruan, et al. Janus: Decoupling visual encoding for unified multimodal understanding and generation. In *Proceedings of the Computer Vision and Pattern Recognition Conference*, pp. 12966–12977, 2025d.
- Shengqiong Wu, Hao Fei, Leigang Qu, Wei Ji, and Tat-Seng Chua. Next-gpt: Any-to-any multimodal llm. In *ICML*, 2024. URL <https://arxiv.org/abs/2309.05519>.
- Size Wu, Zhonghua Wu, Zerui Gong, Qingyi Tao, Sheng Jin, Qinyue Li, Wei Li, and Chen Change Loy. Openuni: A simple baseline for unified multimodal understanding and generation. *arXiv preprint arXiv:2505.23661*, 2025e. doi: 10.48550/arXiv.2505.23661. URL <https://arxiv.org/abs/2505.23661>.
- Yecheng Wu, Zhuoyang Zhang, Junyu Chen, Haotian Tang, Dacheng Li, Yunhao Fang, Ligeng Zhu, Enze Xie, Hongxu Yin, Li Yi, Song Han, and Yao Lu. Vila-u: a unified foundation model integrating visual understanding and generation. In *ICLR*, 2025f. URL <https://arxiv.org/abs/2409.04429>.
- Jinheng Xie, Weijia Mao, Zechen Bai, David Junhao Zhang, Weihao Wang, Kevin Qinghong Lin, Yuchao Gu, Zhijie Chen, Zhenheng Yang, and Mike Zheng Shou. Show-o: One single transformer to unify multimodal understanding and generation. *arXiv preprint arXiv:2408.12528*, 2024. doi: 10.48550/arXiv.2408.12528. URL <https://arxiv.org/abs/2408.12528>.
- Zhiyang Xu, Jiu hai Chen, Zhaojiang Lin, Xichen Pan, Lifu Huang, Tianyi Zhou, Madian Khabza, Qifan Wang, Di Jin, Michihiro Yasunaga, Lili Yu, Xi Victoria Lin, and Shaoliang Nie. Pisces: An auto-regressive foundation model for image understanding and generation. *arXiv preprint arXiv:2506.10395*, 2025. doi: 10.48550/arXiv.2506.10395. URL <https://arxiv.org/abs/2506.10395>.
- Zhiwen Yang, Haowei Chen, Ziniu Qian, Yang Yi, Hui Zhang, Dan Zhao, Bingzheng Wei, and Yan Xu. All-in-one medical image restoration via task-adaptive routing. In *International Conference on Medical Image Computing and Computer-Assisted Intervention*, pp. 67–77. Springer, 2024.
- Jin Ye, Guoan Wang, Yanjun Li, Zhongying Deng, Wei Li, Tianbin Li, Haodong Duan, Ziyang Huang, Yanzhou Su, Benyou Wang, et al. Gmai-mmbench: A comprehensive multimodal evaluation benchmark towards general medical ai. *Advances in Neural Information Processing Systems*, 37: 94327–94427, 2024.

- Syed Waqas Zamir, Aditya Arora, Salman Khan, Munawar Hayat, Fahad Shahbaz Khan, and Ming-Hsuan Yang. Restormer: Efficient transformer for high-resolution image restoration. In *Proceedings of the IEEE/CVF conference on computer vision and pattern recognition*, pp. 5728–5739, 2022.
- Hong Zhang, Zhongjie Duan, Xingjun Wang, Yingda Chen, Yuze Zhao, and Yu Zhang. Nexus-gen: A unified model for image understanding, generation, and editing. *arXiv preprint arXiv:2504.21356*, 2025. doi: 10.48550/arXiv.2504.21356. URL <https://arxiv.org/abs/2504.21356>.
- Kai Zhang, Jun Yu, Eashan Adhikarla, Rong Zhou, Zhiling Yan, Yixin Liu, Zhengliang Liu, Lifang He, Brian Davison, Xiang Li, et al. Biomedgpt: A unified and generalist biomedical generative pre-trained transformer for vision, language, and multimodal tasks. *arXiv e-prints*, pp. arXiv–2305, 2023a.
- Xiaoman Zhang, Chaoyi Wu, Ziheng Zhao, Weixiong Lin, Ya Zhang, Yanfeng Wang, and Weidi Xie. Pmc-vqa: Visual instruction tuning for medical visual question answering. *arXiv preprint arXiv:2305.10415*, 2023b.
- Chunting Zhou, Lili Yu, Arun Babu, Kushal Tirumala, Michihiro Yasunaga, Leonid Shamis, Jacob Kahn, Xuezhe Ma, Luke Zettlemoyer, and Omer Levy. Transfusion: Predict the next token and diffuse images with one multi-modal model. *arXiv preprint arXiv:2408.11039*, 2024. doi: 10.48550/arXiv.2408.11039. URL <https://arxiv.org/abs/2408.11039>.
- Jun-Yan Zhu, Taesung Park, Phillip Isola, and Alexei A Efros. Unpaired image-to-image translation using cycle-consistent adversarial networks. In *Proceedings of the IEEE international conference on computer vision*, pp. 2223–2232, 2017.
- Xuhui Zhuang et al. Vargpt-v1.1: Improve visual autoregressive large multimodal models via post-training and data scaling. *arXiv preprint arXiv:2504.02949*, 2025. doi: 10.48550/arXiv.2504.02949. URL <https://arxiv.org/abs/2504.02949>.

## A APPENDIX

### APPENDIX TABLE OF CONTENTS

|       |                                                          |    |
|-------|----------------------------------------------------------|----|
| A.1   | Implementation Details . . . . .                         | 17 |
| A.1.1 | Training Hyperparameters . . . . .                       | 17 |
| A.2   | Dataset Statistics . . . . .                             | 19 |
| A.2.1 | Dataset Composition Details . . . . .                    | 19 |
| A.2.2 | Medical Domain and Modality Distribution . . . . .       | 19 |
| A.2.3 | Modality and Anatomy Distribution . . . . .              | 20 |
| A.3   | Data Enhancement Pipeline: CAG Implementation . . . . .  | 21 |
| A.3.1 | Stage 1: Structured Description Generation . . . . .     | 21 |
| A.3.2 | Stage 2: Caption Fusion Enhancement . . . . .            | 21 |
| A.3.3 | Stage 3: Thinking-Enhanced Response Generation . . . . . | 22 |
| A.4   | Downstream Task Results . . . . .                        | 24 |
| A.4.1 | Medical Report Generation . . . . .                      | 24 |
| A.4.2 | Visual Question Answering . . . . .                      | 24 |
| A.4.3 | Medical Image Generation . . . . .                       | 25 |
| A.4.4 | Interleaved tasks . . . . .                              | 26 |
| A.5   | Expert Review Validation System . . . . .                | 29 |
| A.5.1 | Expert Review Framework Overview . . . . .               | 29 |
| A.5.2 | Evaluation Dimension Analysis . . . . .                  | 29 |
| A.5.3 | Dataset Quality Comparison Analysis . . . . .            | 29 |
| A.5.4 | Medical Modality-Specific Analysis . . . . .             | 31 |
| A.6   | Downstream Task Performance . . . . .                    | 32 |
| A.6.1 | Medical Report Generation . . . . .                      | 32 |
| A.6.2 | Medical Image Translation . . . . .                      | 32 |
| A.7   | Statement on the Use of Large Language Models . . . . .  | 33 |



## A.1 IMPLEMENTATION DETAILS

### A.1.1 TRAINING HYPERPARAMETERS

Table 6: Training hyperparameters and configurations for the three-stage curriculum learning strategy in UniMedVL. These stages collectively implement the Knowledge component of the OKA framework.

|                                     | Stage 1<br>(Foundation) | Stage 2<br>(Instruction Tuning) | Stage 3<br>(Unified Multimodal) |
|-------------------------------------|-------------------------|---------------------------------|---------------------------------|
| <b>Hyperparameters</b>              |                         |                                 |                                 |
| Learning rate                       | $5 \times 10^{-5}$      | $2.5 \times 10^{-5}$            | $1.0 \times 10^{-5}$            |
| Optimizer                           |                         | AdamW                           |                                 |
| Loss weight (CE : MSE)              |                         | 0.25 : 1.0                      |                                 |
| Training steps                      | 85K                     | 120K                            | 70K                             |
| EMA ratio                           |                         | 0.995                           |                                 |
| Image Resolution (VAE)              | 512-1024                | 512-1024                        | 32-1024                         |
| Image Resolution (ViT)              | 378-980                 | 224-518                         | 378-980                         |
| Max tokens per sample               | 18.5K                   | 20K                             | 27K                             |
| Dropout                             |                         | Text: 0.3, ViT/VAE: 0.05        |                                 |
| ViT training                        | End-to-end              | Feature frozen                  | Feature frozen                  |
| VAE training                        |                         | Feature frozen                  |                                 |
| Understanding branch                |                         | Trainable optimization          |                                 |
| LLM training                        |                         | Trainable adaptation            |                                 |
| <b>Infrastructure Configuration</b> |                         |                                 |                                 |
| GPU Configuration                   | 8× A800                 | 8× A800                         | 8× A800                         |
| Recommended GPUs                    |                         | 16× A800 (80GB each)            |                                 |
| Batch Size                          | 32                      | 24                              | 16                              |
| Gradient Accumulation               | 4                       | 6                               | 8                               |
| <b>Data Sampling Ratio (%)</b>      |                         |                                 |                                 |
| Text-Only                           | 5                       | 5                               | 3                               |
| Text-to-Image (T2I)                 | 25                      | 45                              | 35                              |
| Image-to-Text (I2T)                 | 75                      | 40                              | 37                              |
| Interleaved                         | -                       | 10                              | 25                              |

**Detailed Training Strategy Implementation.** Our training employs a three-stage curriculum learning approach that implements the Knowledge component within the OKA framework. We use the AdamW optimizer throughout all stages:

- Stage 1 (Foundation Training) establishes basic medical understanding over 85K steps with a learning rate of  $5 \times 10^{-5}$ . The data composition prioritizes image-to-text tasks (75%), complemented by text-to-image generation (25%) and pure text data (5%). This stage trains both ViT and LLM components end-to-end while keeping the VAE frozen. The image resolution ranges from 512-1024 pixels for the generation branch and 378-980 pixels for the understanding branch, supporting up to 18.5K tokens per sample.
- Stage 2 (Instruction Tuning) extends training to 120K steps with a reduced learning rate of  $2.5 \times 10^{-5}$ . The data mixture evolves to balance text-to-image (45%) and image-to-text (40%) tasks, while introducing interleaved multimodal datasets (10%). The ViT encoder is frozen at this stage to preserve learned visual features. Token capacity increases to 20K per sample, enabling processing of more complex medical cases and longer contextual information.
- Stage 3 (Unified Multimodal Training) focuses on sophisticated reasoning and generation capabilities over 70K steps with a learning rate of  $1.0 \times 10^{-5}$ . This stage significantly increases interleaved dataset usage (25%) while maintaining balanced generation (35%) and understanding (37%) tasks. The expanded token budget (27K) and broader image resolution range (32-1024 pixels for generation) support interleaved tasks, including medical image super-resolution, modality translation, and counterfactual generation.

**Hardware Requirements and Training Infrastructure.** Our model training was conducted using 8× A800 GPUs (80GB memory each) for experimental validation. However, for optimal training

efficiency and to fully exploit the model’s capacity, we recommend a minimum configuration of 16× A800 GPUs or equivalent hardware.

**Technical Implementation Details.** The training employs a unified loss function that balances understanding and generation objectives with a CE:MSE weight ratio of 0.25:1.0. We apply consistent dropout rates across all stages (Text: 0.3, ViT/VAE: 0.05) to prevent overfitting. The EMA coefficient is set to 0.995 for stable model convergence. The ViT encoder supports flexible aspect ratios through native processing, accommodating diverse medical image formats from different modalities. Throughout training, the VAE remains frozen to maintain stable latent representations, which is particularly important for consistent image generation quality across the progressive training stages.

**Rationale for Using Pretrained VAE without Fine-tuning.** Our approach leverages a general-purpose pretrained VAE model from FLUX (Black Forest Labs, 2024) without medical domain-specific fine-tuning. This design choice addresses two core questions: (1) the reconstruction capability of pretrained VAE on medical imaging modalities, and (2) the cost-benefit trade-off of fine-tuning versus preserving existing capabilities. Regarding the first question, we conducted comprehensive reconstruction experiments across nine medical imaging modalities to evaluate performance. For the second question, considering that our training data is not specifically designed for reconstruction optimization, we did not pursue domain-specific fine-tuning to avoid potential degradation of the model’s general-purpose capabilities while maintaining stable latent representations throughout our progressive training stages.

Table 7: Reconstruction quality evaluation of pretrained VAE models on medical imaging modalities, demonstrating cross-domain generalization capabilities without fine-tuning. These comparisons are sourced from the literature.

| Metric                         | Model      | $f_d$ | CFP   | CT    | CXR   | Endoscopy | HIS   | MRI   | OCT   | Ultrasound |
|--------------------------------|------------|-------|-------|-------|-------|-----------|-------|-------|-------|------------|
| <b>rFID (Lower is Better)</b>  |            |       |       |       |       |           |       |       |       |            |
|                                | VAE (FLUX) | 8     | 13.22 | 5.81  | 5.42  | 11.77     | 10.00 | 10.58 | 13.23 | 9.64       |
|                                | VQGAN      | 8     | 27.22 | 15.97 | 33.57 | 27.73     | 21.33 | 67.68 | 29.48 | 18.66      |
|                                | Emu3-VQ    | 8     | 16.27 | 11.83 | 27.91 | 20.83     | 13.52 | 69.89 | 25.43 | 11.99      |
|                                | MedITok    | 16    | 14.39 | 7.88  | 22.27 | 10.66     | 6.32  | 46.54 | 17.64 | 6.55       |
| <b>PSNR (Higher is Better)</b> |            |       |       |       |       |           |       |       |       |            |
|                                | VAE (FLUX) | 8     | 34.58 | 37.34 | 37.09 | 35.33     | 34.50 | 34.30 | 34.58 | 33.59      |
|                                | VQGAN      | 8     | 35.40 | 31.13 | 29.28 | 25.60     | 29.54 | 20.94 | 24.79 | 31.68      |
|                                | Emu3-VQ    | 8     | 28.96 | 36.11 | 31.68 | 28.96     | 34.32 | 22.08 | 27.57 | 35.81      |
|                                | MedITok    | 16    | 37.72 | 36.32 | 31.69 | 29.17     | 23.55 | 23.55 | 25.49 | 34.42      |
| <b>SSIM (Higher is Better)</b> |            |       |       |       |       |           |       |       |       |            |
|                                | VAE (FLUX) | 8     | 0.892 | 0.951 | 0.973 | 0.934     | 0.922 | 0.921 | 0.892 | 0.938      |
|                                | VQGAN      | 8     | 0.923 | 0.885 | 0.753 | 0.768     | 0.844 | 0.484 | 0.248 | 0.317      |
|                                | Emu3-VQ    | 8     | 0.943 | 0.928 | 0.793 | 0.847     | 0.957 | 0.547 | 0.751 | 0.955      |
|                                | MedITok    | 16    | 0.953 | 0.937 | 0.855 | 0.890     | 0.972 | 0.660 | 0.935 | 0.883      |

The empirical evaluation demonstrates that the VAE (FLUX) achieves competitive reconstruction performance across nine distinct medical imaging modalities without requiring domain-specific fine-tuning. With a compression factor of  $f_d = 8$ , the model consistently delivers low rFID scores, competitive PSNR values, and robust SSIM scores.

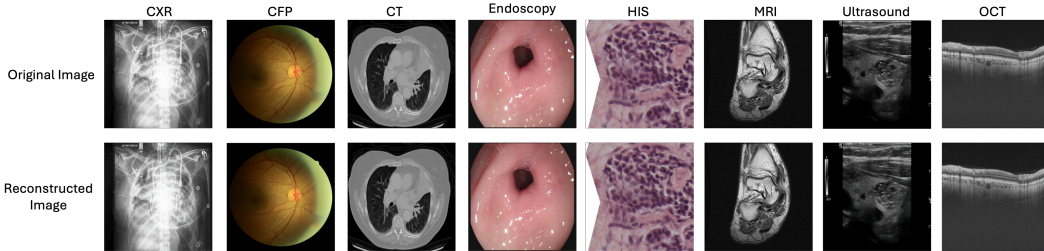

Figure 5: Qualitative comparison of VAE reconstruction quality across diverse medical imaging modalities.

## A.2 DATASET STATISTICS

### A.2.1 DATASET COMPOSITION DETAILS

Table 8: Overview of training stage data distribution, showing data composition, task types, and scale statistics across different stages. Stage 2 utilized the high-quality subset of stage 1 datasets.

| Training Stage                               | Total Entries | Task Categories                        |
|----------------------------------------------|---------------|----------------------------------------|
| <b>Stage 1: Foundation Training</b>          |               |                                        |
| Understanding Tasks                          | 4.0M          | Image comprehension, VQA               |
| Generation Tasks                             | 1.6M          | Text-to-image, controllable generation |
| <i>Stage 1 Subtotal</i>                      | <i>5.6M</i>   | <i>Foundation capabilities</i>         |
| <b>Stage 2: Instruction Tuning</b>           |               |                                        |
| Understanding Tasks                          | 698K          | Image CoT, clinical reasoning          |
| Generation Tasks                             | 668K          | Enhanced T2I, medical translation      |
| CoT Understanding                            | 317K          | Chain-of-thought reasoning             |
| Text-only Tasks                              | 230K          | Medical QA, clinical dialogue          |
| <i>Stage 2 Subtotal</i>                      | <i>1.9M</i>   | <i>Knowledge integration</i>           |
| <b>Stage 3: Unified Multimodal Training.</b> |               |                                        |
| Interleaved Tasks                            | 330K          | 5 interleaved tasks                    |
| <i>Stage 3 Subtotal</i>                      | <i>0.33M</i>  | <i>Unified capabilities</i>            |
| <b>Total Dataset</b>                         | <b>5.6M</b>   | <b>All medical tasks</b>               |

### A.2.2 MEDICAL DOMAIN AND MODALITY DISTRIBUTION

Table 9: Major datasets detailed information, showing key dataset contributions sorted by data volume. For open-source datasets, the reported numbers indicate the actual subset sizes used in our training pipeline after filtering.

| Dataset Name                                                             | Total Entries | Primary Tasks                              |
|--------------------------------------------------------------------------|---------------|--------------------------------------------|
| PMC-OA (Lin et al., 2023)                                                | 1.0M          | Text-to-Image Generation                   |
| Quilt-1m (Ikezogwo et al., 2023)                                         | 644K          | Histopathology Understanding               |
| Healthcpt (Lin et al., 2025)                                             | 638K          | Clinical Reasoning, Image Caption          |
| PubMedVision (Chen et al., 2024a)                                        | 385K          | Controllable T2I Generation                |
| Gmai-vl (Li et al., 2024)                                                | 288K          | Enhanced T2I Generation                    |
| Bigbio (Fries et al., 2022)                                              | 262K          | Clinical Reasoning with CoT                |
| CheXpertPlus (Chambon et al., 2024)                                      | 223K          | Medical Report Understanding               |
| PMC VQA (Zhang et al., 2023b)                                            | 204K          | Image Caption                              |
| Internvl (Chen et al., 2024c)                                            | 188K          | Disease Classification, Clinical Reasoning |
| Medicat (Subramanian et al., 2020)                                       | 132K          | Controllable T2I Generation                |
| Medical-diff-vqa (Hu et al., 2023)                                       | 129K          | Image Caption, Entity Recognition          |
| PMC-Inline (Wu et al., 2025b)                                            | 121K          | Multi-image Understanding                  |
| IXI T2/T1 SR 4x (Information eXtraction from Images (IXI) Project, 2024) | 161K          | Super resolution                           |
| BraTS23 Modality Tran (Baltruschat et al., 2023)                         | 52K           | Cross modal synthesis                      |
| SynthRAD Brain (MR to CT/CT to MR) (Thummerer et al., 2025)              | 66K           | Cross modal synthesis                      |
| SynthRAD Pelvis (MR to CT/CT to MR) (Thummerer et al., 2025)             | 42K           | Cross modal synthesis                      |
| ICG-CXR dataset (Ma et al., 2025b)                                       | 10K           | Counterfactual generation                  |
| BCI dataset (Liu et al., 2022a)                                          | 5K            | Virtual immunohistochemistry staining      |
| <b>Total (Selected Datasets)</b>                                         | <b>4.55M</b>  | –                                          |
| <b>Others Datasets</b>                                                   | <b>1.05M</b>  | –                                          |
| <b>Grand Total</b>                                                       | <b>5.6M</b>   | <b>All Tasks</b>                           |

### A.2.3 MODALITY AND ANATOMY DISTRIBUTION

Figure 6 illustrates the comprehensive statistics of our curated medical datasets, showing both modality distribution and anatomical coverage. These statistics highlight the diversity and quality of data used across different training stages.

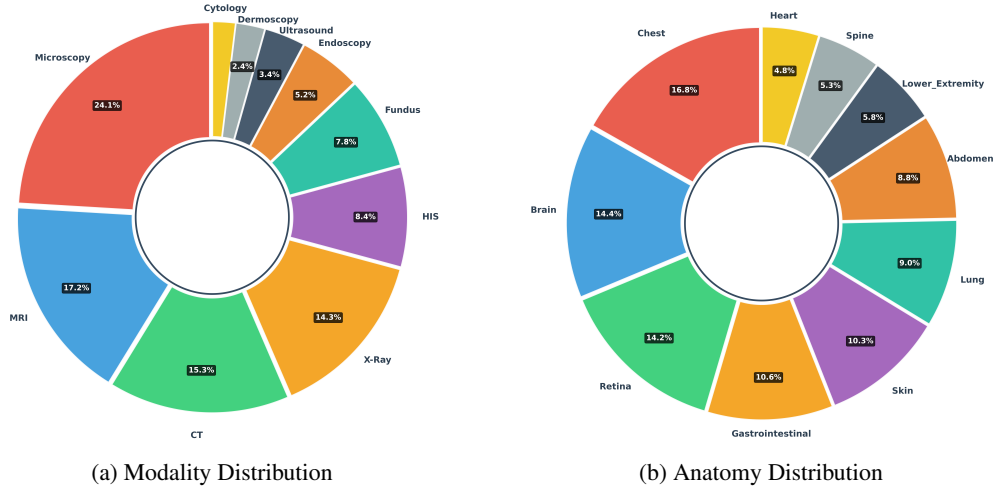

Figure 6: Comprehensive statistics of our curated medical datasets, showing modality distribution and anatomy distribution. These statistics demonstrate the diversity and quality of data used across different training stages.



### A.3 DATA ENHANCEMENT PIPELINE: CAG IMPLEMENTATION

This section presents the complete prompt templates used in our Caption Augmented Generation (CAG) pipeline for image generation tasks, as described in Section 3. The CAG pipeline consists of two main stages: (1) structured medical description generation for quality control, and (2) caption fusion that combines original captions with generated descriptions.

#### A.3.1 STAGE 1: STRUCTURED DESCRIPTION GENERATION

##### Stage 1: Structured Description Generation Prompt

**Purpose:** Generate four-level structured medical image descriptions for quality control and similarity computation

You are a universally expert medical image analyst, proficient in all imaging modalities and anatomical systems. Your input is a single medical image, with no supplementary information. Your only task is to provide a comprehensive, objective, and structured description at four distinct levels, from the highest overview down to the most specific and exceptional findings. You must not offer any diagnostic, interpretive, or clinical advice.

---

Output Structure (Four-Level, Top-to-Bottom -- definitions for your internal guidance; do NOT reproduce these headings in your answer)

##### LEVEL 1: IMAGE TYPE & GLOBAL CONTEXT

- In one sentence, state the presumed imaging modality (if visually clear), main body region(s), and overall image category (e.g., cross-sectional, projectional, histological).
- Example: "This is an axial CT image of the abdomen and pelvis, showing cross-sectional anatomy at the level of the lower kidneys."

##### LEVEL 2: MACRO-ANATOMICAL OVERVIEW

- In 2-4 concise lines, summarize the global distribution and layout of major anatomical regions, dominant structures, and any clearly visible large-scale abnormalities, masses, or disease patterns.
- Describe anatomical orientation, symmetry, major organ relationships, and other visually prominent features.

##### LEVEL 3: ORGAN / SUBREGION DETAILS -- must be the most detailed section

- In 6-12 lines (use complete sentences), describe the visual appearance of individual organs, vessels, bones, or other relevant subregions.
- Provide precise, granular, reproducible details so that all main features can be reconstructed.
- Maintain strict objectivity; do not include diagnostic language.

##### LEVEL 4: SPECIAL OR INCIDENTAL FINDINGS

- List any unusual devices, postsurgical changes, image artifacts, rare morphologic features, or observations not already mentioned above.
- If none are visible, explicitly state: "No distinct pathological or incidental findings are visible."

##### Writing Instructions

1. Write the entire description as one continuous paragraph that implicitly follows the LEVEL 1 → LEVEL 4 order--do not include level headings, bullet points, or numbered lists in the paragraph.
2. Do not use bullet points elsewhere (except within the examples).
3. For more complex images, the portion corresponding to LEVEL 3 should naturally be longer; for simpler cases, keep it proportionally concise.
4. Avoid any clinical judgement or speculation--describe only what is directly visible.

#### A.3.2 STAGE 2: CAPTION FUSION ENHANCEMENT

This stage fuses original captions with Stage 1 generated structured descriptions to create enhanced descriptions for image generation tasks.

##### Stage 2: Caption Fusion Enhancement Prompt

**Purpose:** Fuse original captions with structured descriptions for enhanced image generation prompts

You are a universally expert medical image analyst, proficient in all imaging modalities and anatomical systems.

CRITICAL CONSTRAINT: You must maintain absolute anatomical consistency. NEVER change, assume, or modify the anatomical location described in the original caption. Do not make assumptions about different anatomical locations or transfer descriptions between different body parts.

Your input consists of:

1. A structured, objective, four-level description derived from a locally deployed AI model (following a strict hierarchy from global overview to specific findings).
2. An original, data-derived textual description containing high-density, potentially diagnostic or interpretative information, which may lack structured clarity.

Your task is to:

- First, critically review and confirm the completeness of the structured description generated by the local model.
- Then, systematically extract and objectively incorporate relevant, visually verifiable details from the original data-derived description, enhancing information density without including diagnostic, interpretive, or clinical judgement.
- Clearly indicate and explicitly include visually evident anatomical abnormalities, structural deviations, or incidental observations present in the original data but omitted in the structured description.

Output Structure (Four-Level, Top-to-Bottom)

LEVEL 1: IMAGE TYPE & GLOBAL CONTEXT

- In one sentence, state the presumed imaging modality, main body region(s), and overall image category.

LEVEL 2: MACRO-ANATOMICAL OVERVIEW

- In 2--4 concise lines, summarize global anatomical distribution, dominant structures, anatomical symmetry or deviations, and clearly visible large-scale abnormalities.

LEVEL 3: ORGAN / SUBREGION DETAILS -- must be the most detailed section

- In 6--12 complete sentences, describe individual organs, bones, vessels, and other relevant anatomical subregions in precise, reproducible detail.
- Objectively highlight visually confirmed abnormalities or structural deviations derived from the original data description.

LEVEL 4: SPECIAL OR INCIDENTAL FINDINGS

- Explicitly mention unusual devices, postsurgical changes, rare morphological features, or visually detectable anomalies present in the original description yet absent in the structured description.
- Clearly state the absence of commonly expected baseline anatomical or pathological features if definitively not observed in the image.

Writing Instructions

1. Write the final enhanced description as a single, continuous paragraph implicitly following LEVEL 1 → LEVEL 4 order--do not include explicit level headings, bullet points, or numbered lists.
2. Avoid any clinical judgement, diagnostic language, or speculative interpretation--include only details directly verifiable from visual inspection.
3. Start your output with "Please generate a realistic [modality] image showing" to make it a proper generation instruction.

### A.3.3 STAGE 3: THINKING-ENHANCED RESPONSE GENERATION

This stage aims to elicit the reasoning process from the medical foundation model (MediGama-27B-IT) by prompting it to explicitly generate its internal thinking steps. We leverage this specialized medical model to simulate detailed reasoning processes through the structured prompt format. The resulting data, which includes both the explicit thinking traces and the final responses, is then used to train our model.

#### Stage 3: Thinking-Enhanced Response Generation Prompt (Revised v2)

**Purpose:** Generate medical image responses with thinking tags for enhanced reasoning and quality control

System: You are a medical image generator. You create [modality] images based on clinical descriptions. Your responses should describe what features you have generated in the image from the creator's perspective. Use bullet points to organize the anatomical structures and clinical features you have included in your generated image.

User: Based on this clinical description: "[clinical\_description]"

You have been given the corresponding medical image. Please provide a response following this format:

Required format:  
 <think>Analyzing the clinical description, I need to generate an image that captures: 1) The key pathological process described, 2) The anatomical structures involved, 3) The specific imaging characteristics for [modality]. Based on the clinical presentation, I should include [key features reasoning]. [structured\_caption if available]</think>

Here/This is the generated [modality] image that displays:

- [anatomical structure or clinical finding 1]
- [anatomical structure or clinical finding 2]
- [anatomical structure or clinical finding 3]

IMPORTANT:

1. In the <think> tag, reason through WHAT you need to generate and WHY based on medical knowledge
2. Respond from the GENERATOR perspective - describe what features you have CREATED/GENERATED in the image
3. Use the exact format above with bullet points (•) to list features
4. Start with 'Here is the generated [modality] image that displays:'
5. Each bullet point should describe a specific anatomical structure, clinical finding, or visual feature that you have included
6. Do NOT use observational language like 'shows', 'visible', 'can be seen' - instead use generative language like 'displays', 'includes', 'features', 'contains'

Note: The thinking tag should reflect your decision-making process: "I need to generate X because Y", "The clinical description indicates I should include Z", etc.

The enhanced captions from Stage 2 (if the process "generating" is not generated successfully) and Stage 3 (if the process "thinking" is generated successfully) are sampled and then submitted to the Expert Review system (Section A.5) for final validation.

## A.4 DOWNSTREAM TASK RESULTS

### A.4.1 MEDICAL REPORT GENERATION

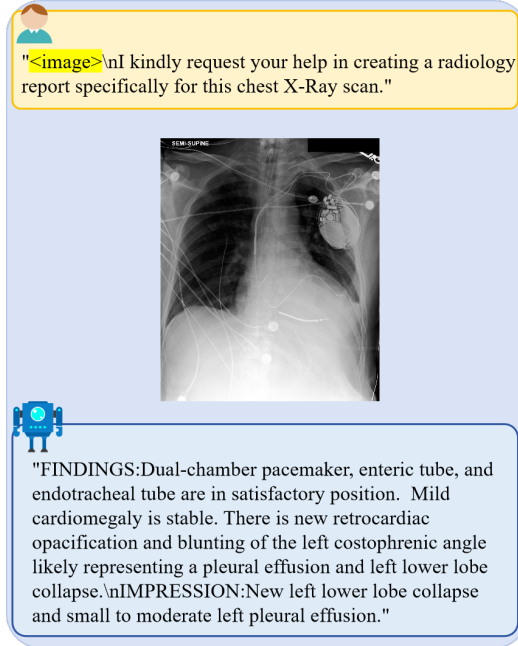

Figure 7: Medical report generation examples showing input images and generated reports.

### A.4.2 VISUAL QUESTION ANSWERING

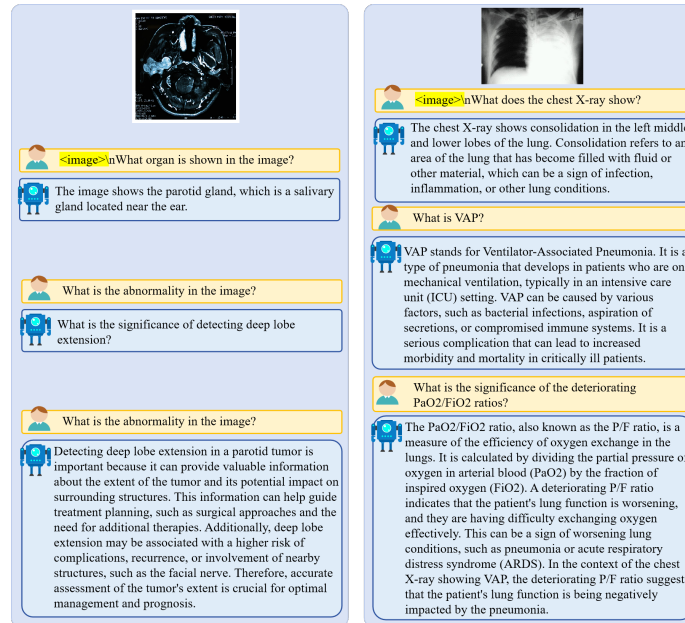

Figure 8: Visual question answering examples across different medical imaging modalities.

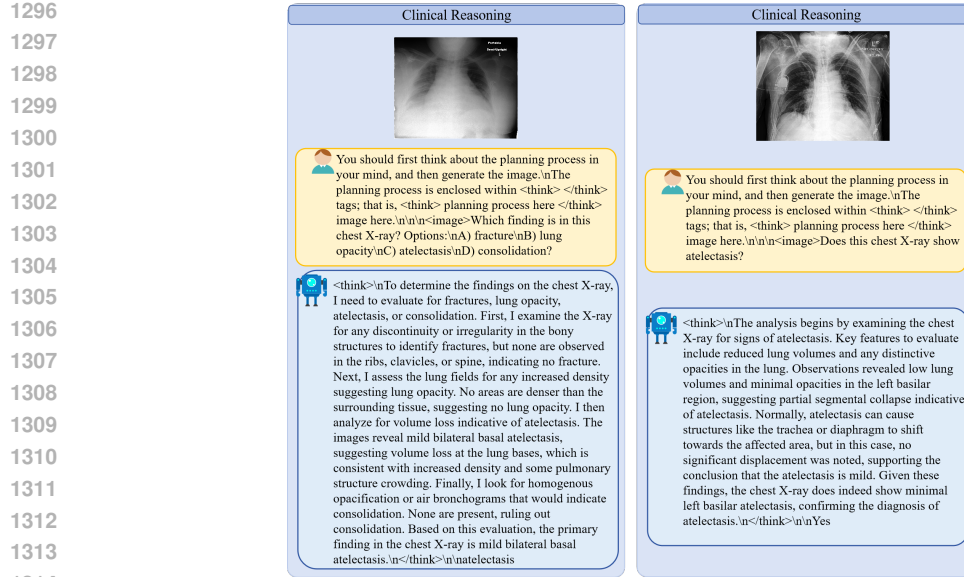

Figure 9: Visual question answering examples across different medical imaging modalities(part 2).

#### A.4.3 MEDICAL IMAGE GENERATION

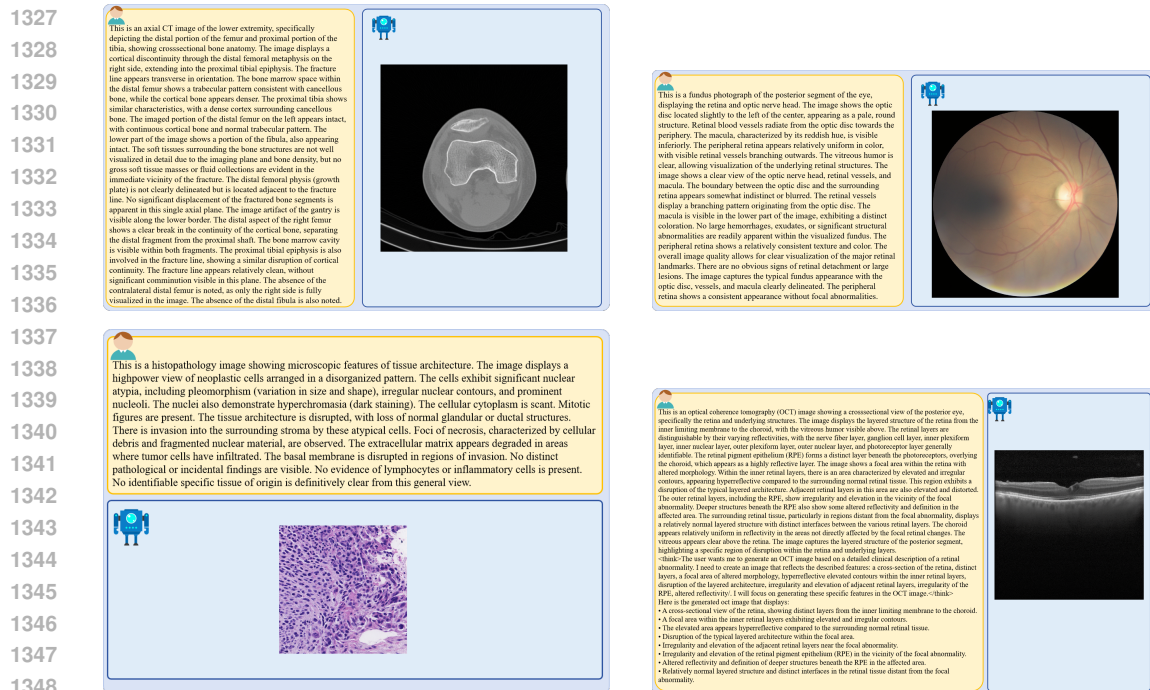

Figure 10: Medical image generation examples with text prompts.



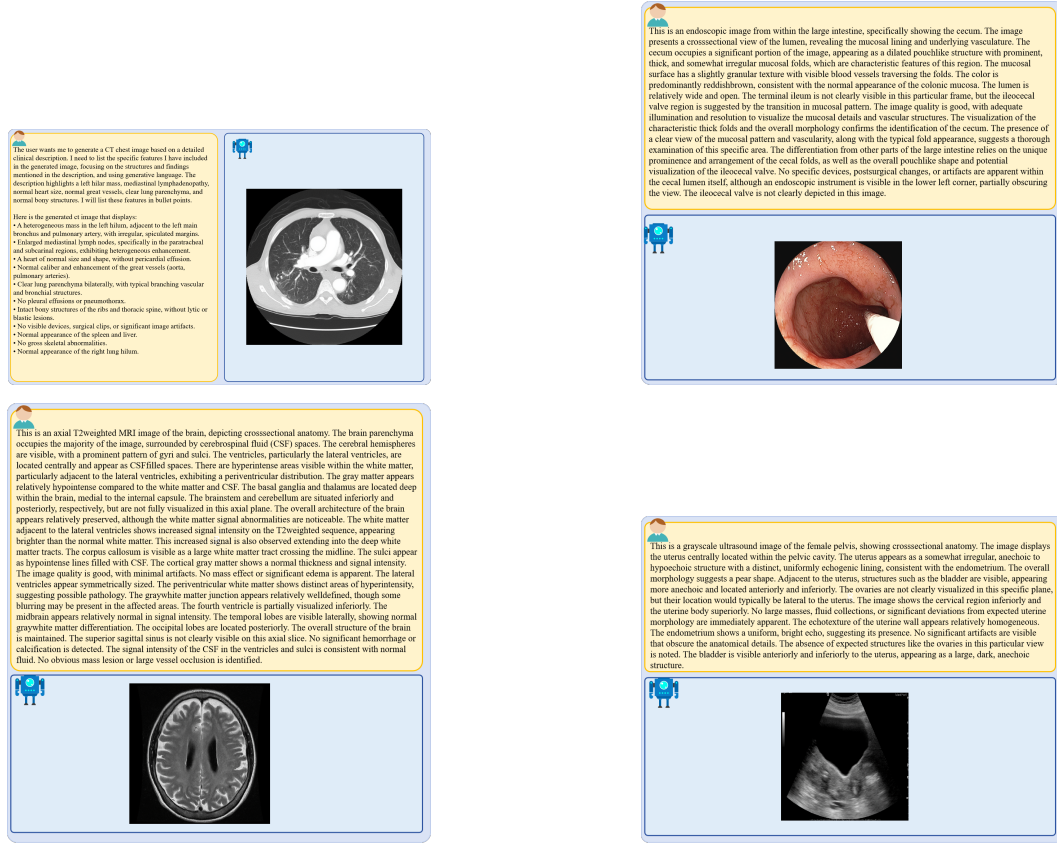

Figure 11: Medical image generation examples with text prompts(part 2).

#### A.4.4 INTERLEAVED TASKS

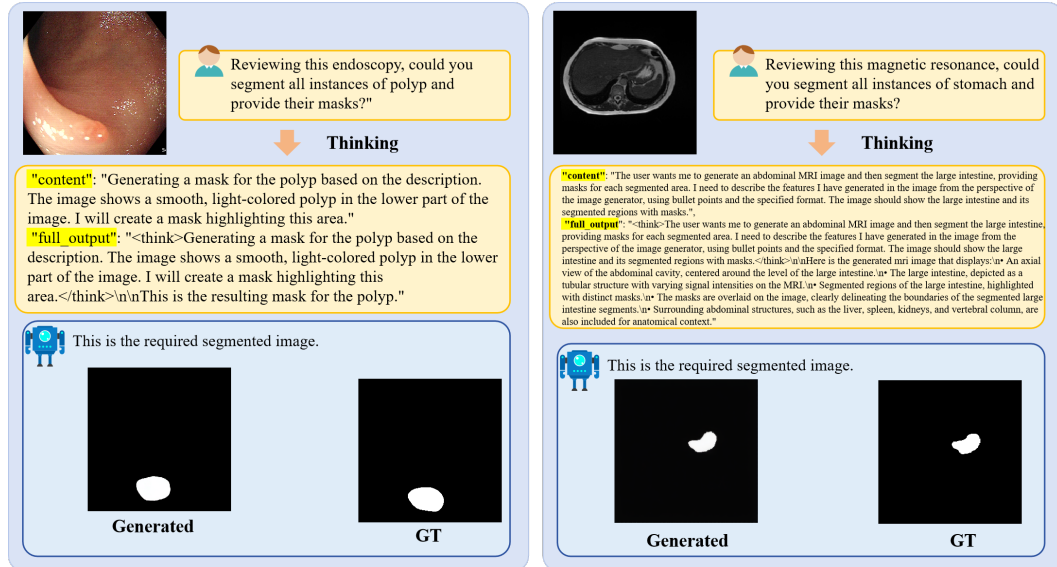

Figure 12: Medical Image Prompt Segmentation.

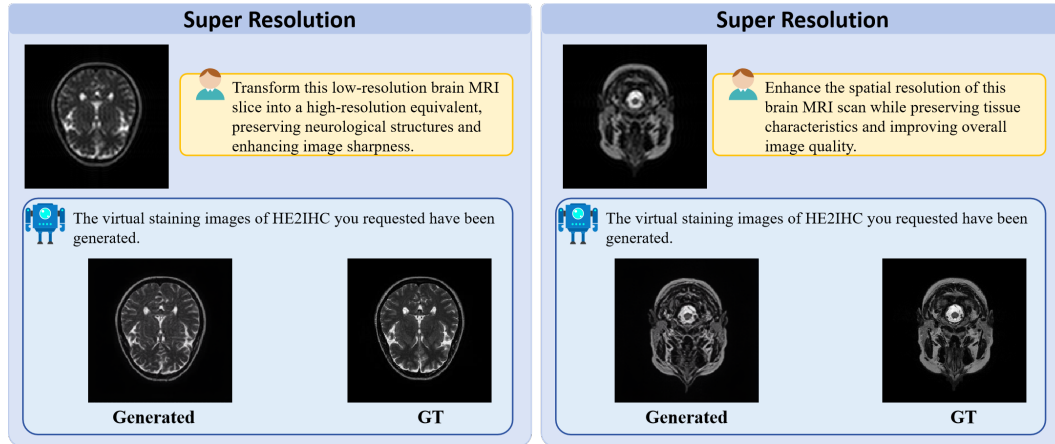

Figure 13: Super Resolution.

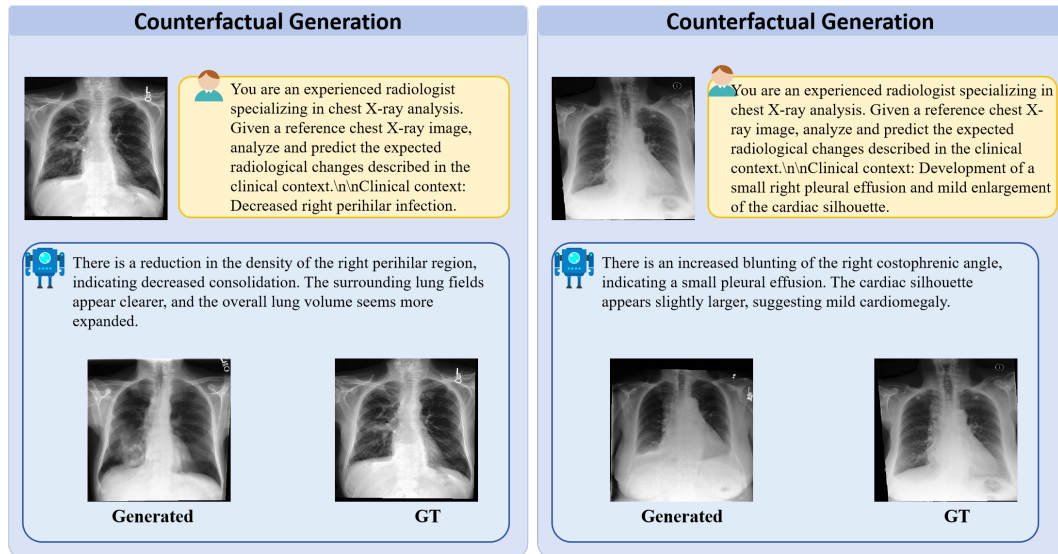

Figure 14: Counterfactual Generation.

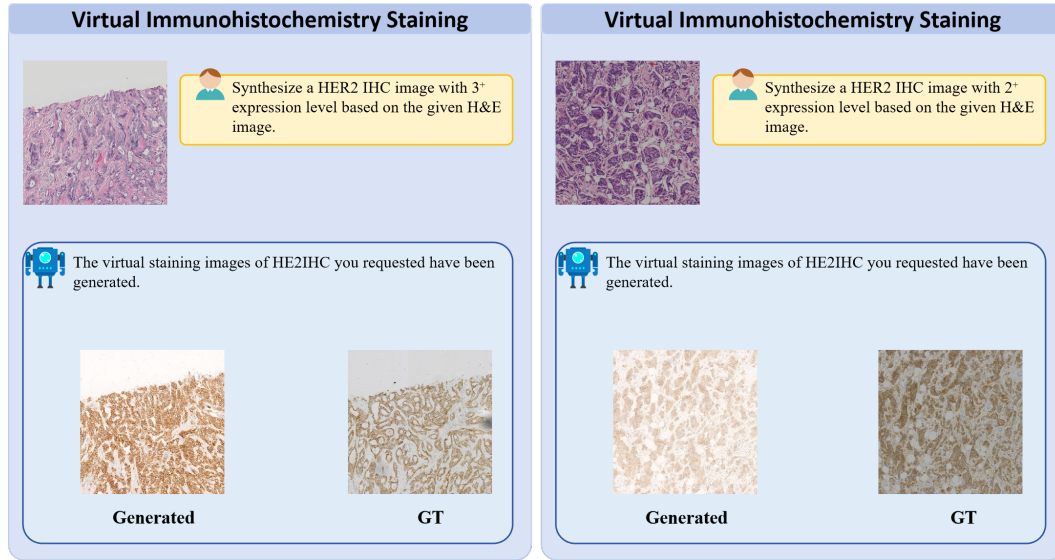

Figure 15: Virtual Immunohistochemistry Staining.

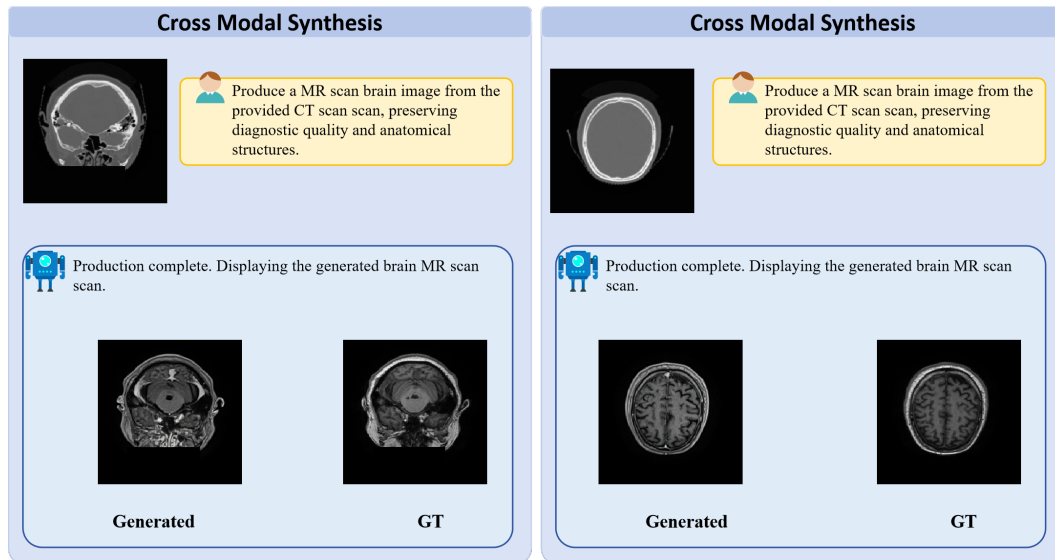

Figure 16: Cross Modal Synthesis.

## A.5 EXPERT REVIEW VALIDATION SYSTEM

This section presents a comprehensive expert review validation system that validates both the quality of our UniMed-5M dataset construction and the effectiveness of our thinking-enhanced generation approach described in the Data Enhancement Pipeline (Section A.3).

Our expert review validation system serves a dual purpose in ensuring both comprehensive data quality validation and methodological verification. The system ensures that enhanced captions generated through our multi-stage pipeline maintain medical accuracy and clinical relevance, while simultaneously validating that our thinking-enhanced methodology produces the superior results demonstrated in Figure 19.

### A.5.1 EXPERT REVIEW FRAMEWORK OVERVIEW

Our expert review validation system is designed around the seven-dimensional medical evaluation framework that captures critical aspects of medical AI performance. This framework was implemented as the standardised evaluation protocols used in clinical practice.

Our evaluation framework encompasses seven critical dimensions that collectively assess medical AI performance comprehensively. The framework begins with **Modality Match (0-1)**, which measures consistency between images and declared medical imaging modalities, followed by **Factual Accuracy (0-5)** that evaluates the precision of anatomical structure and pathological finding descriptions. **Information Completeness (0-5)** assesses coverage of diagnostically relevant key information, while **Position/Quantity Accuracy (0-5)** measures precision in anatomical localization and quantitative assessments. The framework also incorporates **Professionalism (0-5)** to evaluate adherence to medical reporting standards and conventions, **Planning Coherence (0-5)** to assess systematic thinking and logical organization quality, and finally **Clinical Reasoning (Turing Test) (0-5)** to measure approximation to human expert-level performance.

**Expert Validation Protocol:** Experts conducted comprehensive audits of 200 samples across all seven dimensions. The evaluation process achieved inter-rater agreement exceeding 0.85, with expert ratings across all dimensions observed to be  $\geq 0.85$ , substantiating the dataset’s clinical reliability and mitigating potential LLM hallucinations.

### A.5.2 EVALUATION DIMENSION ANALYSIS

This subsection presents statistical analysis of the seven evaluation dimensions across our expert validation dataset, with detailed insights revealed through Figure 17. Our analysis demonstrates exceptional performance across most dimensions, with Factual Accuracy achieving 88.4% and Position Accuracy reaching 88.3%, indicating robust anatomical and pathological understanding capabilities. The Professionalism dimension scored 87.8%, reflecting adherence to medical reporting standards, while Clinical Reasoning achieved 78.6%, suggesting areas for improvement in complex diagnostic reasoning tasks. As shown in Figure 17a, strong correlations exist between complementary dimensions, particularly between Factual Accuracy and Information Completeness, validating the coherence of our evaluation framework.

### A.5.3 DATASET QUALITY COMPARISON ANALYSIS

This section provides a comprehensive comparative analysis between thinking-enhanced and simple generation approaches across all seven evaluation dimensions, with results visualized in Figure 18. The radar chart in Figure 18a clearly demonstrates systematic improvements achieved by the thinking approach across all evaluation metrics, while Figure 18b ensures balanced representation across nine medical imaging modalities, confirming comprehensive coverage in our validation dataset.

The quantitative analysis reveals consistent and significant improvements across all dimensions when employing the thinking-enhanced approach. Most notably, Information Completeness improved by +0.048, demonstrating enhanced coverage of diagnostically relevant information, while Planning Coherence gained +0.040, indicating superior systematic thinking organization. Professionalism showed a +0.037 improvement, reflecting better adherence to medical reporting standards, with Position Accuracy (+0.036) and Factual Accuracy (+0.034) also demonstrating meaningful enhancements.

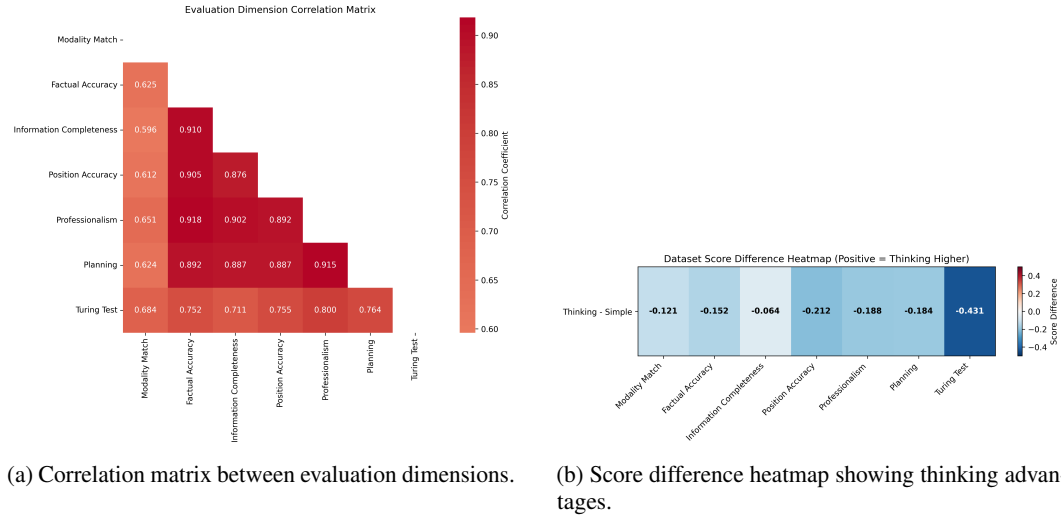

Figure 17: **Expert evaluation analysis.** (a) Correlation matrix revealing inter-dimensional relationships. (b) Heatmap showing performance differences between approaches.

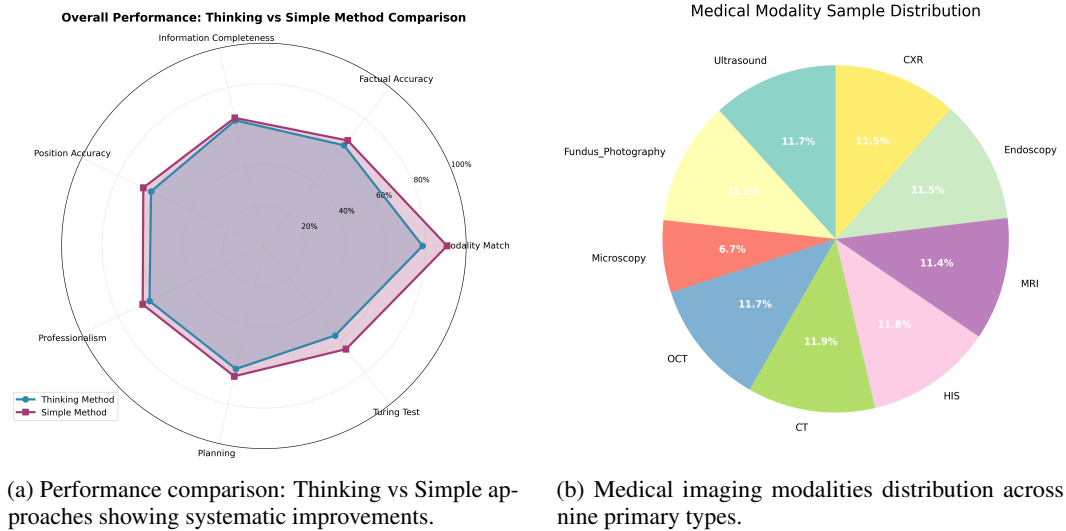

Figure 18: **Expert validation overview.** (a) Radar chart displaying systematic improvements achieved by the thinking approach across all seven evaluation dimensions. (b) Pie chart showing balanced representation across medical imaging modalities, ensuring comprehensive coverage.



These improvements, as visualized in Figure 17b, validate the effectiveness of our thinking-enhanced methodology in producing higher-quality medical AI outputs.

#### A.5.4 MEDICAL MODALITY-SPECIFIC ANALYSIS

This section provides detailed modality-specific analysis across nine medical imaging modalities, with comprehensive performance insights presented in Figure 19 and Figure 20. The analysis reveals distinct performance patterns across different imaging modalities, with statistical comparisons shown in Figure 19a and detailed performance metrics displayed in Figure 19b.

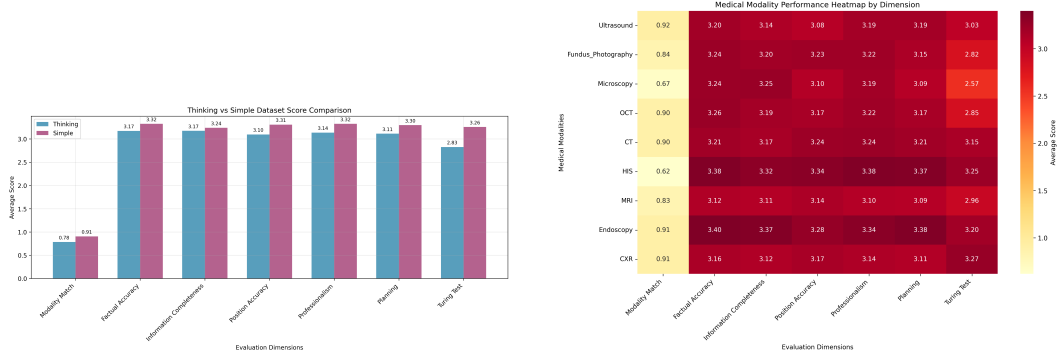

(a) Statistical comparison between thinking and simple approaches.

(b) Modality-specific performance analysis.

Figure 19: **Comprehensive performance analysis.** (a) Bar chart showing mean scores with confidence intervals. (b) Heatmap displaying modality-specific performance scores.

The modality-specific analysis reveals nuanced performance characteristics across different imaging types, as detailed in Figure 19b. CT and MRI modalities demonstrate consistently high performance across all evaluation dimensions, reflecting the model’s strong understanding of cross-sectional anatomy and pathological presentations. Histopathology shows particularly strong factual accuracy scores, indicating effective recognition of cellular and tissue-level features. However, Endoscopy and OCT modalities reveal opportunities for improvement in clinical reasoning capabilities, suggesting the need for enhanced training on complex diagnostic scenarios in these domains. Microscopy-based evaluations indicate requirements for enhanced professionalism in reporting conventions, as shown in the modality ranking presented in Figure 20.

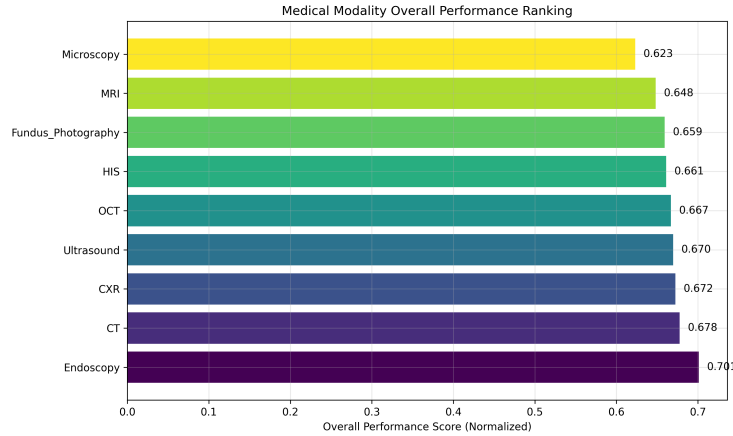

Figure 20: **Modality ranking.** Performance rankings across medical imaging modalities.

## A.6 DOWNSTREAM TASK PERFORMANCE

### A.6.1 MEDICAL REPORT GENERATION

Table 10: **Medical report generation performance on MIMIC-CXR dataset.** Evaluation of automated radiology report generation using three metrics: ROUGE-L (lexical similarity), RaTE (radiology-specific terminology accuracy), and RadCliQ<sup>-1</sup> (clinical quality assessment). Higher scores indicate better performance for all metrics. Baseline results are sourced from published literature. **Bold** indicates best performance and underlined indicates second-best performance.

| Models                         | MIMIC-CXR<br>ROUGE-L | MIMIC-CXR<br>RaTE | MIMIC-CXR<br>RadCliQ <sup>-1</sup> |
|--------------------------------|----------------------|-------------------|------------------------------------|
| GPT-4.1                        | 9.0                  | 51.3              | 57.1                               |
| Claude Sonnet 4                | 20.0                 | 45.6              | 53.4                               |
| Gemini-2.5-Flash               | 25.4                 | 50.3              | 59.4                               |
| Med-R1-2B                      | 19.3                 | 40.6              | 42.4                               |
| MedLM-R1-2B                    | 20.3                 | 41.6              | 48.3                               |
| MedGemma-8B-IT                 | 25.6                 | <b>52.4</b>       | 62.9                               |
| LLaVA-Med-7B                   | 15.0                 | 12.8              | 52.9                               |
| HuatuoGPT-V-7B                 | 23.4                 | 48.9              | 48.2                               |
| BioMediX2-8B                   | 20.0                 | 44.4              | 53.0                               |
| Qwen2.5VL-7B                   | 24.1                 | 47.0              | 55.1                               |
| InternVL2-8B                   | 23.2                 | 47.0              | 56.2                               |
| InternVL3-8B                   | 22.9                 | 48.2              | 55.1                               |
| Lingshu-7B                     | <b>30.8</b>          | <u>52.1</u>       | <b>69.2</b>                        |
| HealthGPT-14B                  | 21.4                 | 48.4              | 52.7                               |
| HuatuoGPT-V-34B                | 23.5                 | 48.5              | 47.1                               |
| MedDr-40B                      | 15.7                 | 45.2              | 47.0                               |
| InternVL3-14B                  | 22.0                 | 48.6              | 46.5                               |
| Qwen2.5VL-32B                  | 15.7                 | 47.5              | 45.2                               |
| InternVL2.5-38B                | 22.7                 | 47.5              | 54.9                               |
| InternVL3-38B                  | 22.8                 | 47.9              | 47.2                               |
| Lingshu-32B                    | <u>28.8</u>          | 50.8              | <u>67.1</u>                        |
| UniMedVL (Full Model Response) | 19.2                 | 45.0              | 42.4                               |

### A.6.2 MEDICAL IMAGE TRANSLATION

Table 11: **Unpaired chest X-ray opacity removal translation performance.** Task involves transforming CXRs with lung opacities to opacity-free counterparts while preserving anatomical structures. Evaluation metrics: FID (Fréchet Inception Distance) and KID (Kernel Inception Distance), where lower values indicate better image quality and distributional similarity. Baseline results are sourced from published literature. **Bold** indicates best performance and underlined indicates second-best performance.

| Model                       | FID ↓        | KID ↓        |
|-----------------------------|--------------|--------------|
| <b>Baselines</b>            |              |              |
| Original CXRs               | 81.80        | 0.043        |
| Munit                       | 109.4        | 0.073        |
| Unit                        | 103.2        | 0.061        |
| CycleGAN                    | 208.3        | 0.216        |
| Uvcgan                      | 210.4        | 0.225        |
| Drit                        | 117.6        | 0.087        |
| AAMA-CDA                    | <u>67.18</u> | <u>0.016</u> |
| <b>Unified Models</b>       |              |              |
| HealthGPT-M3                | 62.19        | 0.031        |
| <b>UniMedVL<sup>†</sup></b> | <b>35.1</b>  | <b>0.008</b> |

A.7 STATEMENT ON THE USE OF LARGE LANGUAGE MODELS

Throughout the preparation of this manuscript, we utilized large language models to enhance the quality of the text. Specifically, we employed GPT and Claude for tasks related to language refinement, including correcting grammar and spelling, improving sentence clarity, and ensuring a consistent academic tone.

The core scientific contributions, including the formulation of the problem, the proposed methodology, the design and execution of experiments, and the interpretation of results, are entirely the work of the authors. All text generated or modified by the LLM was meticulously reviewed, edited, and revised by the authors to ensure it accurately reflects our original ideas and findings. The authors bear full and final responsibility for all content presented in this paper.
